1 ***Nfkbid* is required for immunity and antibody responses to *Toxoplasma***  
2 ***gondii***

3

4 Scott P. Souza<sup>1,3</sup>, Samantha D. Splitt<sup>1,3</sup>, Julia A. Alvarez<sup>1,3</sup>, Juan C. Sanchez-Arcila<sup>1</sup>, Jessica N.  
5 Wilson<sup>1,3</sup>, Safuwra Wizzard<sup>1</sup>, Zheng Luo<sup>4</sup>, Nicole Baumgarth<sup>4</sup>, Kirk D.C. Jensen<sup>1, 2#</sup>

6

7 <sup>1</sup>School of Natural Sciences, Department of Molecular and Cell Biology, University of California,  
8 Merced

9

10 <sup>2</sup>Health Science Research Institute, University of California, Merced

11

12 <sup>3</sup>Graduate Program in Quantitative and Systems Biology, University of California, Merced

13

14 <sup>4</sup>Center for Immunology & Infectious Diseases, and Department of Pathology, Microbiology and  
15 Immunology, University of California, Davis

16

17 #Email: [kjensen5@ucmerced.edu](mailto:kjensen5@ucmerced.edu)

18 **Keywords:** B-1 cells, B-2 cells, isotype class switching, *Nfkbid*, IκBNS, *Toxoplasma gondii*, atypical strains,  
19 recombinant inbred mice, QTL, vaccines

20

21

22 **SHORT TITLE**

23 *Nfkbid*-dependent immunity to *T. gondii*

24

25 **ABSTRACT**

26 Protective immunity to parasitic infections has been difficult to elicit by vaccines. Among parasites  
27 that evade vaccine-induced immunity is *Toxoplasma gondii*, which causes lethal secondary  
28 infections in chronically infected mice. Here we report that unlike susceptible C57BL/6J mice, A/J  
29 mice were highly resistant to secondary infection. To identify correlates of immunity, we utilized  
30 forward genetics to identify *Nfkbid*, a nuclear regulator of NF- $\kappa$ B that is required for B cell  
31 activation and B-1 cell development. *Nfkbid*-null mice (bumble) did not generate parasite-specific  
32 IgM and lacked robust parasite-specific IgG, which correlated with defects in B-2 cell maturation  
33 and class-switch recombination. Though high-affinity antibodies were B-2 derived, transfer of B-  
34 1 cells partially rescued the immunity defects observed in bumble mice and were required for 100%  
35 vaccine efficacy in bone marrow chimeric mice. Immunity in resistant mice correlated with robust  
36 isotype class-switching in both B cell lineages, which can be fine-tuned by *Nfkbid* gene expression.  
37 We propose a model whereby humoral immunity to *T. gondii* is regulated by *Nfkbid* and requires  
38 B-1 and B-2 cells for full protection.

39

40 **AUTHOR SUMMARY**

41 Eukaryotic parasitic diseases account for approximately one fifth of all childhood deaths, yet no  
42 highly protective vaccine exists for any human parasite. More research must be done to discover  
43 how to elicit protective vaccine-induced immunity to parasitic pathogens. We used an unbiased  
44 genetic screen to find key genes responsible for immunity to the eukaryotic parasite *Toxoplasma*  
45 *gondii*. Our screen found *Nfkbid*, a transcription factor regulator, which controls B cell activation  
46 and innate-like B-1 cell development. Mice without *Nfkbid* were not protected against *T. gondii*

47 and were deficient at making antibodies against the parasite. Our survival studies of vaccinated  
48 mice with and without B-1 compartments found that B-1 cells improved survival, suggesting that  
49 B-1 cells act in conjunction with B-2 cells to provide vaccine-induced immunity. *Nfkbid* and other  
50 loci identified in our unbiased screen represent potential targets for vaccines to elicit protective  
51 immune responses against parasitic pathogens.

52

### 53 INTRODUCTION

54 The goal of vaccination is to induce immunological memory that can protect from natural infection  
55 challenge. Depending on the pathogen, effective memory would need to protect also against a wide  
56 variety of pathogen-specific strains encountered in nature. Such protection is termed heterologous  
57 immunity and is effective against pathogen strains that differ in virulence, immune evasion, or  
58 polymorphic antigens. Parasites represent a special challenge to vaccine development. Indeed, an  
59 entirely protective vaccine has yet to be achieved for any human parasite [1]. The apicomplexan  
60 parasite *Toxoplasmas gondii*, provides an excellent system to explore requirements for  
61 heterologous immunity to a parasitic pathogen. *T. gondii* is a globally spread intracellular protozoan  
62 parasite of warm-blooded animals that exhibits great genetic diversity [2]. *T. gondii* strains differ  
63 dramatically in primary infection virulence in laboratory mice [3] and in severity of human  
64 toxoplasmosis [4-6]. Such infections can be overcome by immunological memory responses  
65 elicited by vaccination or natural infection. In particular, memory CD8 T cells and induction of  
66 IFN $\gamma$  are primarily responsible for protection against lethal secondary infections with the widely  
67 studied type I RH strain, which has a lethal dose of one parasite in naïve mice [7-9]. CD4 T cells  
68 are required to help the formation of effector CD8 T cell [10] and B cell responses [11], but the  
69 ability to adoptively transfer vaccine-elicited cellular immunity to naïve recipients against the type  
70 I RH challenge is unique to memory CD8 T cells [8,9].

71           The role of B cells in *T. gondii* infections is less understood. Previous studies showed that  
72 B cell deficient mice (muMT) are extremely susceptible to primary [12], chronic [13] and  
73 secondary infections [14], despite unimpaired levels of IFN $\gamma$ . Passive transfer of antibodies from  
74 immunized animals into vaccinated muMT mice significantly prolongs their survival after  
75 challenge [11,14]. IgM seems particularly suited for blocking cellular invasion by *T. gondii* [15],  
76 while IgG can perform both neutralization [16] and opsonization functions [17]. Antibody  
77 responses against *T. gondii* are dependent on CD4 T cells [11,18], and are regulated by cytokines  
78 that modulate T follicular helper cell and germinal center B cell formation in secondary lymphoid  
79 organs [19], suggesting conventional “B-2” B cell responses provide antibody-mediated immunity  
80 to *T. gondii*.

81           In addition, “B-1” cells are innate-like lymphocytes that are known for producing self- and  
82 pathogen-reactive “natural” IgM. B-1 cells are the predominant B cell compartment within the body  
83 cavities, including the peritoneal and pleural spaces and contribute to antigen-specific responses to  
84 many pathogens. In mouse models of secondary bacterial infections, including *Borrelia hermsii*,  
85 *Streptococcus pneumoniae* and non-typhoid *Salmonella*, vaccination induces protective memory  
86 B-1 cells to T cell-independent bacterial antigens (reviewed in [20]). This memory is often  
87 restricted to the B-1(b), or CD5- subset of B-1 cells [21], but not in all models [22]. In the *T. gondii*  
88 model, one study suggested that primed CD5+ B-1(a) cells can rescue B-cell-deficient mice during  
89 primary infection with a low virulence strain [12]. Memory B cells are also appreciated to secrete  
90 pathogen-specific IgM [23], and generate somatically mutated IgM to combat blood stage  
91 secondary infection with *Plasmodium* [24]. Whether IgM responses to *T. gondii* are B-2 or B-1  
92 derived is unknown. Moreover, the role of B-1 cells in promoting immunity to *T. gondii* during a  
93 secondary infection has yet to be determined.

94           Particularly troubling for vaccine development for *T. gondii* is the lack of sterilizing  
95 immunity achieved following infection [25]. Unlike the highly passaged lab type I RH strain, for

96 which most immunological memory studies have been performed, the less passaged type I GT1  
97 strain and atypical strains, many of which are endemic to South America, cause lethal secondary  
98 infections in C57BL/6J mice and co-infect (i.e. “superinfect”) the brains of challenged survivors  
99 [25]. During secondary infection memory CD8 T cells become exhausted, but checkpoint blockade  
100 fails to reverse disease outcome [26]. The data suggest yet unknown mechanisms are needed to  
101 provide heterologous immunity to highly virulent strains of *T. gondii*. Therefore, we set out to  
102 address whether additional requirements are necessary for heterologous immunity to *T. gondii*.  
103 Through use of forward and reverse genetics, we discovered a previously unidentified essential role  
104 for *Nfkbid* in immunity and antibody responses to *T. gondii*, and present evidence that both B-1 and  
105 B-2 cells assist resistance to secondary infection with highly virulent parasite strains.

106

## 107 **RESULTS**

### 108 **Non-MHC loci control resistance to secondary infection with *Toxoplasma gondii***

109 When mice are given a natural infection with a low virulent type III CEP strain and allowed  
110 to progress to chronic infection for 35-42 days, the immunological memory that develops is known  
111 to protect against secondary infections with the commonly studied lab strain, type I RH. In contrast,  
112 highly virulent “atypical” strains such as those isolated from South America (VAND, GUYDOS,  
113 GUYMAT, TgCATBr5) or France (MAS, GPHT, FOU) and the clonal type I GT1 strain led to  
114 morbidity and mortality in C57BL/6J mice at varying frequencies, depending on the strain type and  
115 their virulence factors [25]. To explore whether host genetics influenced the ability to survive  
116 secondary infection, a similar experiment was performed with A/J mice. In contrast to C57BL/6  
117 mice, A/J mice were resistant to secondary infection with all virulent atypical *T. gondii* strains  
118 analyzed (Fig 1A) and cleared parasite burden as early as day 4 post challenge (Fig 1B). In contrast,  
119 naïve A/J mice succumb to infections with atypical strains (not shown). These results suggest that  
120 at least one or more genetic loci controls immunity to virulent challenge.

121 A/J mice are known to be resistant to primary infections with the intermediate virulent type  
122 II strain [27], and prevent cyst formation due to polymorphisms in their MHC class I H-2 molecule,  
123 L<sup>d</sup> [28]. To test whether the H-2 locus contributes to immunity we compared secondary infections  
124 in C57BL/10 (B10) and C57BL/10.A (B10.A) mouse strains, the latter carrying the MHC H-2 locus  
125 of A/J (H-2a) in place of C57BL/6's MHC H-2 (H-2b). Compared to mice with the H-2b haplotype,  
126 mice expressing H-2a had less cysts and weighed more during chronic infection with type III strains  
127 (P<0.04; Fig S1). Despite their relative health at the time of challenge, B10.A mice were highly  
128 susceptible (0%-30% survival) to secondary infection with certain atypical strains (VAND, GUY-  
129 DOS, GPHT, FOU), but displayed varying degrees of resistance to others (TgCATBr5, MAS,  
130 GUY-MAT; 60-100% survival) (Fig 1A). In the case of MAS secondary infection, B10.A mice but  
131 not B10 mice were highly resistant and exhibited reduced parasite burden by day 8 post challenge  
132 (Fig 1B). Together, the data suggest that while the MHC H-2a locus is an important modifier of  
133 resistance to certain *T. gondii* strains, this is not true for every challenge. Importantly, the A/J  
134 genetic background encodes additional non-MHC-linked genes that control immunity to *T. gondii*.

### 135 **Genetic mapping reveals four loci that correlate with immunity to *Toxoplasma gondii***

136 To identify non-MHC loci that promote resistance to secondary infection, we first analyzed  
137 the outcome of infection with the type I GT1 *T. gondii* strain, as this strain caused lethal secondary  
138 infections in B10 and B10.A, but not in A/J or first filial generation A/J x C57BL/6J mice ('F1')  
139 (Fig 1C). Following secondary infections, A/J and F1 mice showed no overt symptoms of weight  
140 loss, dehydration, or lethargy (not shown). However, sterile immunity was not achieved. For  
141 example, the GT1 strain was present in the brains of these survivors (i.e. "superinfection"), and at  
142 greater frequencies in F1 compared to A/J mice (Fig 1D). Superinfections were also detected at  
143 high frequencies in B10 and B10.A surviving mice challenged with atypical strains. Overall, mice  
144 of the C57BL genetic background were more prone to superinfection compared to A/J mice (Table  
145 S1). It is unknown whether virulent strains of *T. gondii* have evolved to superinfect hosts with

146 immunological memory, as previously hypothesized [25]. Nonetheless, our results underscore the  
147 difficulty in achieving sterile immunity to parasites in otherwise genetically resistant hosts.

148         Then we performed secondary infection experiments with the type I GT1 strain using 26  
149 recombinant inbred (RI) mice (Table S2). The AxB:BxA RI mouse panel contains an assortment  
150 of homozygous A/J and C57BL/6 alleles, which assist genetic mapping of loci that contribute to  
151 various phenotypes, including those related to *T. gondii* infection [27,29]. Genetic mapping  
152 revealed four distinct Quantitative Trait Loci (QTL) peaks with logarithm of the odds (LOD) scores  
153 greater than 3 on chromosomes 7, 10, 11 and 17 (Fig 2A). None of the QTLs bore evidence for  
154 epistatic interactions (not shown), and only the chromosome 10 QTL surpassed genome-wide  
155 permutation testing (n=1000, P<0.05). Nevertheless, an additive-QTL model including all four  
156 QTLs best fit the data compared to any lesser combination of them (P<0.02, ANOVA). The  
157 estimated effect on the phenotypic variance observed in the RI panel is 24%, 41%, 21% and 27%  
158 for the chromosome (chr) 7, 10, 11 and 17 QTLs, respectively. Consistent with these estimates,  
159 complete phenotypic penetrance (i.e. allelic correlation at 100%) was not observed for any locus  
160 (Fig 2B). Moreover, replacing chromosomes 7 or 10 of C57BL/6J with those of A/J conferred no  
161 survival advantage to secondary infection in consomic mice (Fig S2). Regardless, small effect  
162 QTLs controlling complex traits can still lead to the identification of causal genes within a QTL  
163 region, as occurred for the successful identification of MHC 1 L<sup>d</sup> as the host resistance factor to  
164 chronic *T. gondii* infection [28].

165         *Nfkbid* is one of the most polymorphic genes within the chr7 QTL region (Mb 30.3-33.0)  
166 and sits between the genetic markers that flank the highest imputed LOD score (Dataset S1). This  
167 gene encodes IκBNS, which is a member of atypical NF-κB inhibitors, called nuclear IκBs,  
168 reflecting their restricted cellular localization. Unlike classical inhibitors of NF-κB, atypical NF-  
169 κB inhibitors can modulate NF-κB to induce or repress transcription [30]. Previous work has shown  
170 that *Nfkbid* null mice completely fail to develop B-1 cells, lack circulating IgM and IgG3

171 antibodies, and cannot respond to T-independent (T-I) type II antigens such as NP-ficolin [31-33].  
172 IκBNS also promotes early plasma blast differentiation [34] and IgG1 responses to model T-  
173 dependent antigens [RW.ERROR - Unable to find reference:doc:6096c5808f080d3356fb1a6a],  
174 enhances T cell production of IL-2 and IFN $\gamma$  [35], supports development of T regulatory cells [36]  
175 and suppresses TLR-induced cytokine expression in macrophages [37]. The tetraspanin, *Tspan8*,  
176 is within the chr10 QTL (Mb 115.8-116.2) and is the most highly polymorphic gene between A/J  
177 and C57BL/6J mice in this region (Dataset S1). *Tspan8* is 6-fold more highly expressed in spleens  
178 from A/J compared to C57BL/6 mice (immgen.org). *Tspan8* promotes cancer metastasis [38] and  
179 can impact leukocyte migration [39], but its role in immunity is largely unknown. Other  
180 polymorphic gene candidates within the four QTLs are listed in Dataset S1.

181 ***Nfkbid* on chromosome 7 is required for immunity and the generation of *Toxoplasma gondii*-**  
182 **specific antibodies**

183         Given the role of *Nfkbid* in several immune functions, degree of polymorphism and central  
184 location within the chr7 QTL, the requirement for *Nfkbid* in immunity to *T. gondii* was further  
185 explored. *Nfkbid* null “bumble” mice (C57BL/6) have previously been described, which were  
186 derived from an ENU mutagenesis screen. These mice possess a premature stop codon in *Nfkbid*,  
187 rendering them unable to support T-I antibody responses and B-1 development [32]. Bumble mice  
188 survived primary infection with the low virulent CEP strain at frequencies similar to wildtype  
189 C57BL/6J mice (Fig 2C) but succumbed to secondary infection three days earlier when challenged  
190 with the GT1 strain (Fig 2D). Since the C57BL genetic background is uniformly susceptible to GT1  
191 secondary infections used in our genetic screen, susceptibility to challenge with the commonly  
192 studied type I RH strain was explored, which is normally controlled in vaccinated or chronically  
193 infected mice [7-9]. Importantly, bumble mice were entirely susceptible to secondary infection with  
194 the type I RH strain (Fig 2E), which exhibited greater parasite loads compared to wildtype mice  
195 (Fig 2F). Moreover, bumble mice failed to generate parasite specific-IgM, and were poor producers



196 of parasite-specific IgG3, IgG2b and IgG2a antibody responses after chronic infection (Fig 3A).  
197 The remaining antibodies that were secreted exhibited defects in their ability to block parasite  
198 invasion of host cells (Fig 3B). Antibodies from naïve mice fail to bind *T. gondii*, thus natural  
199 antibodies do not recognize *T. gondii*, consistent with previous reports [15]. Although *Nfkbid*  
200 promotes T cell production of IFN $\gamma$  and IL-2 in in vitro stimulation assays [35] and promotes  
201 thymic development of FOXP3<sup>+</sup> T regulatory cells [36], no impairment of T cell cytokine  
202 production was observed, nor were frequencies of FOXP3<sup>+</sup> CD25<sup>hi</sup> CD4<sup>+</sup> T regulatory cells altered  
203 in bumble compared to wildtype mice during secondary infection (Fig S3).

204 To determine where the breakdown in the B cell response occurred in bumble mice,  
205 immunophenotyping was employed. Consistent with previous reports, bumble mice have greatly  
206 reduced marginal zone B cells in naïve mice and did not increase in frequency during *T. gondii*  
207 infection (not shown). Atypical B cells (FCLR5<sup>+</sup> CD80<sup>+</sup> CD73<sup>+</sup>) which respond to *Plasmodium*  
208 infections in mice [40] were also reduced in bumble compared to B6 mice following *T. gondii*  
209 infection (not shown). The memory CD73<sup>+</sup> B cell compartment in bumble mice bore evidence for  
210 reduced class switching during *T. gondii* infection, as they remain mainly IgM<sup>+</sup>IgD<sup>+</sup> while  
211 C57BL/6J mice have higher frequencies of IgM-IgD<sup>-</sup> cells (Fig 3C). Most pronounced, however,  
212 is a large accumulation of transitional stage immature B-2 cells in bumble mice that occurs during  
213 chronic infection, implicating that B cell responses to *T. gondii* may require reinforcement from  
214 recent bone marrow derived emigrants that is blocked in the absence of *Nfkbid*. Hence, *Nfkbid* is  
215 not only an important regulator of B-1 cell development through the transitional stage of immature  
216 B cell development in the steady state [41], but also for B-2 cell maturation, differentiation and  
217 activation during *T. gondii* infection.

### 218 **Defective B-1 and B-2 responses underlie bumble's defect in immunity**

219 The impaired ability of bumble mice to generate parasite-specific antibodies, combined  
220 with the documented collapse of the B-1 cell compartment in *Nfkbid*-deficient mice [31,32],

221 prompted us to directly assess the role of B-1 mediated immunity and humoral responses to *T.*  
222 *gondii*. First, total peritoneal exudate cells (PerC) were adoptively transferred into bumble mice at  
223 day 2 of birth, which allows optimal B-1 engraftment and self-renew for the life of the animal [42].  
224 Then, bumble mice that received total PerC transfers were infected with the avirulent type III strain  
225 at 6-7 weeks of age and given a secondary infection 35 days later with the type I RH strain (Fig  
226 4A). Bumble mice receiving PerC partially reconstituted serum IgM to ~40% of wildtype levels  
227 (Fig S4A), consistent with previous studies [42], and had a significantly delayed time to death  
228 relative to non-transferred littermates following type I RH challenge (Fig 4A). Previous studies  
229 have shown B-1 cells respond to infections and create both pathogen- [21,43] and microbiota -  
230 specific antibodies [44]. Antibody profiling of bumble mice that received PerC transfer showed a  
231 trend of increased anti-*T. gondii* antibody generation following chronic infection (Fig 4B), but  
232 antibody reactivity to the parasite did not reach levels observed in wildtype mice, suggesting the  
233 B-1 compartment has a limited role in generating high-affinity parasite-specific antibodies. The B  
234 cell compartment responsible for generating parasite-specific antibody was further confirmed with  
235 Igh-allotype chimeric mice which allow tracking of IgM responses of allotype-marked B-1 and B-  
236 2 cells [45]. In this experimental setup, endogenous B cells of the C57BL/6 background (IgH-b  
237 allotype) are depleted with allotype specific anti-IgM-b antibodies and replaced with transferred  
238 PerC B-1 of the IgH-a allotype which are refractory to the depletion antibodies and will engraft for  
239 the life of the animal. Following removal of the depleting antibodies, the endogenous B-2 cell  
240 population reemerge and are marked with anti-IgM-b antibodies, while the transferred B-1 cell are  
241 marked with anti-IgM-a antibodies (Fig 4C). Assessing antibody responses generated in IgH-  
242 allotype chimeric mice during a *T. gondii* infection revealed the presence of B-1 derived IgM-a  
243 antibodies that had low reactivity to *T. gondii* at days 14 and 30 post-infection, but the majority of  
244 highly reactive parasite-specific IgM-b was derived from the B-2 compartment (Fig 4D).

245           Attempts to explore the role of B-1 and B-2 cells utilizing B cell deficient muMT mice  
246 were complicated by their high susceptible to primary infection with the CEP strain, irrespective  
247 of whether they received PerC as neonates or splenic B-2 cells prior to the primary infection (Fig  
248 S4C-E), thus underscoring the importance of B cells in resistance to *T. gondii* infection [13].  
249 Instead, mixed bone marrow chimeras were generated in which irradiated bumble or wildtype  
250 recipients were transferred wildtype or bumble bone marrow to reconstitute B-2 cells and the rest  
251 of the hematopoietic compartment. Since B-1a cells do not efficiently reconstitute irradiated  
252 recipients from adult bone marrow [46], some recipients received wildtype PerC to restore the B-1  
253 compartment in this setting [43]. These and other bone marrow chimeras (not shown) all  
254 succumbed to primary CEP infections (Fig S5). To bypass the susceptibility of irradiated bone  
255 marrow recipients to live *T. gondii* infections [47], bone marrow chimeras were vaccinated with a  
256 replication deficient uracil auxotroph strain (RH  $\Delta ompdc \Delta up$ ) improving overall survival (Fig S5).  
257 Whereas vaccinated wildtype recipient mice that received *Nfkbid*-sufficient but not bumble bone  
258 marrow were able to survive type I RH challenge (Fig 4E), complete immunity was conferred only  
259 when they were transferred PerC. This study also suggests that *Nfkbid* is important in the non-  
260 hematopoietic lineage, as complete immunity was restored only in wildtype but not bumble  
261 recipients (Fig 4E). In summary, our reconstitution studies emphasize the importance of *Nfkbid*  
262 sufficiency in multiple compartments and highlight B-1 cells as an important contributor to *T.*  
263 *gondii* immunity.

#### 264 **Evidence for enhanced B-1 and B-2 cell activation in resistant A/J mice**

265           Since *Nfkbid* has a profound effect on the maturation and activation of multiple B cell  
266 populations in the C57BL/6J background, we extended our analysis of the humoral response to the  
267 resistant A/J background. A/J mice were found to have a superior IgG response to parasite lysate  
268 antigen during secondary infections (Fig 5A), suggesting enhanced humoral responses in this  
269 background. Within the spleen, both susceptible C57BL/6J and resistant A/J mice produced similar

270 frequencies of memory B cell CD73<sup>+</sup> FCRL5<sup>-</sup> and atypical memory CD73<sup>+</sup> FCRL5<sup>+</sup> CD80<sup>+</sup>  
271 populations during infection (not shown), however in A/J mice these compartments were drastically  
272 increased in their class-switch recombination frequencies during secondary infection (Fig 5B). The  
273 enhanced class switch potential of resistant mice was also observed in B-1 cells. Within the  
274 peritoneal B-1 cell compartment (CD19<sup>+</sup> B220<sup>int</sup> CD11b<sup>+</sup>) increased percentages of CD5<sup>-</sup> B-1b  
275 cells were observed during secondary infection in A/J mice, which appear to have downregulated  
276 their BCR as evidenced by being IgM<sup>lo</sup> (Fig 6A-B). To further validate these findings, frequencies  
277 of class switched IgM-IgD<sup>-</sup> CD5<sup>+</sup> (B-1a) or CD5<sup>-</sup> (B-1b) cells within the CD43<sup>+</sup> B-1 cell  
278 compartments of the peritoneum (not shown) and spleen were determined, and a similar trend was  
279 observed (Fig 6C). Following infection, B-1 cells in the spleens of A/J mice maintained high levels  
280 of BAFFR and TACI expression and expressed higher levels of surface CD138 relative to  
281 C57BL/6J mice (Fig 6D-E), markers known to be induced by *Nfkbid* and important for B cell  
282 activation and differentiation into antibody secreting cells [34]. In addition to differences in  
283 humoral immunity, an increase in peritoneal CD8 T cell in vitro recall production of IFN $\gamma$  was  
284 noted in A/J relative to C57BL/6J mice, however other parameters, including granzyme B and IL-  
285 2 expression and CD4 T cell responses were similar (Fig S6). Collectively these data suggest that  
286 while CD8 T cell production of IFN $\gamma$  is enhanced in resistant mice, and likely contributes to their  
287 resistance, B-2 and B-1 cells participate in a strikingly enhanced humoral response in A/J mice,  
288 offering insight into how immunity against parasitic infections may be achieved.

289 **B-1 cells in resistant A/J mice have enhanced germline transcription of *Ighg* constant regions,**  
290 **class switch recombination and different activation profiles**

291 The diminished antibody response in bumble mice as well as the B cell phenotypic  
292 differences noted in A/J mice prompted us to investigate further how *Nfkbid* may be modulating  
293 the B cell compartment in both genetic backgrounds. A transcriptomic approach was taken to define  
294 peritoneal B-1a, B-1b and B-2 cell response characteristics in resistant and susceptible mice during

295 naïve, chronic and secondary infection states (Dataset S2). GO term enrichment analysis  
296 consistently found type I and II interferon signaling and immune defense signatures as being  
297 enriched in the most differentially regulated genes among B cells following infection irrespective  
298 of genetic background (Fig S7A, not shown). Looking specifically at CD5- B-1b cells in A/J mice,  
299 which bore evidence for enhanced activation (Fig 6), pathway enrichment analysis of genes  
300 differentially upregulated on day 5 of secondary infection compared to the naïve state found  
301 additional signatures of TLR-signaling, complement activation and somatic recombination (Fig  
302 S7A). Germline transcription of *Ighg1*, *Ighg3*, *Ighg2b*, and *Ighg2a/c* was greatly enhanced in CD5-  
303 B-1b cells from A/J compared to C57BL/6J mice on day 5 of secondary infection (Fig 6F),  
304 suggesting heightened isotype class switching occurred in mice on the resistant background.  
305 Consistent with their IgM-IgD- phenotype (Fig 6B 6C), both B-1a and B-1b cells underwent  
306 significant IgG isotype class-switching as revealed by intracellular staining, which was readily  
307 observed in the splenic environment of A/J mice (Fig 6 G-H) where activated B-1 cells migrate to  
308 secrete antibody [RW.ERROR - Unable to find reference:doc:60996ae58f08a04c290530c2].  
309 Moreover, *Scimp* an adaptor for TLR4 signaling [50], *Semaphorin7* a noted inducer of  
310 inflammatory cytokines [51], the alarmins *S100a8* and *S100a9*, and genes associated with tissue  
311 tolerance including *Retnlg* and *Slpi*, were specifically upregulated in CD5- B-1b cells from A/J  
312 compared to C57BL/6 mice on day 5 of challenge (Fig S7B). Gene Set Enrichment Analysis  
313 (GSEA) of CD5- B-1b transcriptional variation between mice on day 5 of challenge detected  
314 correlation with gene sets that distinguish B cells following vaccination with different TLR-  
315 stimulating adjuvants (MPL vs R848, GSE25677) (Fig S7C). In summary, the transcriptomics data  
316 suggest in the resistant A/J background, but not in C57BL/6J mice, B-1 cells undergo Ig class  
317 switch recombination, perhaps through enhanced TLR-signaling.

### 318 **Gene dosage of *Nfkbid* impacts parasite-specific IgG1 responses**

319           Because *A/J Nfkbid* polymorphisms are largely found in non-coding regions (Dataset S1),  
320 we hypothesized that B cell differences observed in our system could be due to differences in *Nfkbid*  
321 expression levels. To investigate this possibility, we quantified *Nfkbid* expression within our  
322 transcriptomic dataset as well as by qPCR. B cells from C57BL/6J mice had greater expression of  
323 *Nfkbid* relative to A/J, particularly at the chronic infection stage (Fig 7A). Because *Nfkbid*  
324 expression differences could reflect heightened responsiveness to parasite load, we stimulated  
325 enriched peritoneal and splenic B cells from A/J and C57BL/6J mice with LPS and noted that B  
326 cells from C57BL/6J mice had on average 1.5- to 2-fold greater induction of *Nfkbid* transcripts  
327 relative to A/J (Fig 7B).

328           To explore how gene dosage of *Nfkbid* impacts antibody responses generated against *T.*  
329 *gondii*, serum from chronically infected bumble heterozygotes (*Nfkbid*<sup>+/-</sup>), C57BL/6J, and A/J  
330 mice were analyzed. Although parasite-specific IgM and IgG3 did not differ between mouse strains  
331 (not shown), increased parasite-specific IgG1 serum responses were observed in A/J relative to  
332 C57BL/6 mice, a response that was phenocopied for IgG1 in bumble heterozygotes (Fig 7C-D).  
333 The increase in IgG1 was also reflected in CD138<sup>+</sup> plasma cell differentiation in the bumble  
334 heterozygotes (Fig 7E-F), consistent with previous reports that *Nfkbid* regulates plasma blast and  
335 IgG1 responses [RW.ERROR - Unable to find reference:doc:6096c5808f080d3356fb1a6a]. Hence,  
336 while *Nfkbid* is required for the generation of IgM and robust IgG responses against *T. gondii*, gene  
337 dosage of *Nfkbid* further controls IgG1 isotype profiles, presenting *Nfkbid* as tunable modulator of  
338 antibody IgG responses to parasites. Of note, when *Nfkbid*<sup>+/-</sup> mice were given secondary infections  
339 with the GT1 strain, all mice succumbed to the challenge (not shown), observations that are  
340 consistent with a multiple-QTL model for *T. gondii* immunity and apparent need for additional  
341 modifiers on chromosomes 10 and 17 to survive highly virulent challenges.

342

343 **DISCUSSION**

344           The findings of this study underscore the utility of using inbred mouse panels to uncover  
345 novel determinants of immunity to parasites. An unbiased genetic screen identified *Nfkbid*, a  
346 tunable regulator of humoral responses to parasites. Within the C57BL/6J background, *Nfkbid* is  
347 required for maturation and class switching of B-2 cells during chronic *T. gondii* infection. While  
348 B-2 responses dominate the antibody response in this background, the lack of B-1 cells appear  
349 partially responsible for the immunity defect observed in bumble and are required for immunity in  
350 bone marrow chimeric mice. In contrast, survival against *T. gondii* infection in resistant mice  
351 correlates with a strong layered humoral response: enhanced activation and class-switching in both  
352 B-1 and B-2 cells. In this context, B-1 cells may assist the B-2 response to provide full immunity  
353 to challenge. The ability of B-1 cells to make parasite-specific antibodies, though of lower affinity,  
354 potentially amplifies B-2 immune responses to *T. gondii* through internalization of B-1 cell-derived  
355 antigen-antibody complexes [52], assisting MHCII antigen presentation for CD4 T cell help [53].  
356 Moreover, the effect of B cell-mediated immunity to *T. gondii* and other pathogens is likely  
357 underestimated in murine models using the C57BL/6 background, as enhanced B-1 and B-2  
358 responses were primarily observed in A/J mice.

359           Though the exact pathway remains to be investigated, *Nfkbid* is downstream of TLR  
360 signaling in B cells [31,32,34], which in B-1a cells causes them to downregulate CD5 and facilitate  
361 differentiation into antibody secreting cells [44,54]. CD5 is a potent negative regulator of antigen  
362 receptor signaling that renders B-1a cells unresponsive to B cell receptor (BCR)-triggering. This  
363 inhibition is overcome by TLR-stimulation which causes CD5 to dissociate with the BCR, thereby  
364 releasing repression of BCR-mediated signaling and antibody secretion [54] against foreign- and  
365 self-antigen [44]. These data suggest CD5- B-1b cells may represent an activated state of B-1 cells,  
366 and calls into question a strict division of labor between these two subsets. This supposition would  
367 fit several of the observations made in our system, including evidence for enhanced class switch  
368 recombination and TLR-gene signatures observed in the CD5- B-1 cells of the resistant

369 background. In addition, BAFFR and TACI are known inducers of class-switch recombination [55],  
370 and increased expression of these receptors may further lower the threshold of activation and  
371 differentiation into CD138+ plasmablasts/plasma cells, all of which are regulated by *Nfkbid* [34]  
372 and occurring with greater magnitude in B-1 cells of genetically resistant A/J mice. Although class  
373 switch recombination occurs with much greater frequency in B-2 cells of A/J mice, we found no  
374 evidence for enhanced expression of BAFFR and TACI in this compartment following *T. gondii*  
375 infection (not shown). Further investigation of pathways upstream of *Nfkbid* has the potential to  
376 elucidate key requirements for *T. gondii* immunity.

377 *Nfkbid* appears to regulate transitional development in B-2 cells, which is analogous to  
378 previous findings in B-1 cells [41], but only evident following *T. gondii* infection. As immature B  
379 cells migrate out of the bone marrow to the spleen, there are several checkpoints which are  
380 controlled by NF- $\kappa$ B such as BCR- or BAFF-mediated signaling [56], both of which are regulated  
381 by *Nfkbid* [34]. Our observation of an accumulation of transitional B cells during *T. gondii* infection  
382 in bumble mice suggest *Nfkbid* plays a role in stabilizing advancement out of these developmental  
383 checkpoints. *Nfkbid* could act as a negative regulator of BCR signaling, enabling pathogen-reactive  
384 B-2 cells to develop beyond negative selection that would otherwise occur as antigen accumulates  
385 in secondary lymphoid organs over time. Alternatively, *Nfkbid* could be a positive regulator of NF-  
386  $\kappa$ B signaling, increasing the strength of BCR signaling to enable transitional B cells to become  
387 mature B cells. In both cases, a developmental defect likely restricts the pool of *T. gondii*-reactive  
388 mature B cells, preventing replenishment of antibody secreting cells during infection, culminating  
389 in the low parasite-specific antibody titers observed in bumble mice.

390 It is important to emphasize that multiple polymorphisms determine the complex  
391 phenotype of secondary infection immunity to *T. gondii*. Our genetic screen revealed at least 4 loci  
392 that each account for 20-40% of the overall heterologous immunity to *T. gondii*, and that the H-2  
393 locus can be an important modifier of resistance against certain parasite strains. Perhaps not



394 surprising, the *Nfkbid* polymorphism in a stand-alone fashion did not fully restore immunity, as  
395 inferred from chromosome 7 consomic mice and by our attempts to mimic the lower gene  
396 expression observed in resistant mice through heterozygous expression. Whereas polymorphic  
397 *Nfkbid* contributes 21% to this phenotype, perhaps by regulating plasma cell differentiation (Fig 7),  
398 this smaller effect QTL was instrumental in identifying *Nfkbid*, where a more drastic gene  
399 inactivation revealed its role in multiple compartments in bumble mice, notwithstanding its  
400 requirement for humoral immunity.

401 In summary, heterologous immunity to a parasitic pathogen should, at a minimum, prevent  
402 disease against a wide variety of strains that differ in virulence or polymorphic antigens. An ideal  
403 parasite vaccine would entirely protect against re-infection and induce sterile immunity, thought  
404 possible since re-infection studies were first performed in mice [57] and humans immunized with  
405 irradiated sporozoites and *Plasmodium sp.* challenge [58]. Yet, only one partially protective vaccine  
406 is in use for any human parasitic pathogen, RTS,S/AS01, which has low efficacy for malaria  
407 prevention [59]. Our findings highlight the role of both innate and conventional B cells in humoral  
408 immunity to *T. gondii*, introducing B-1 cells as a potential vaccine target along with B-2 cells to  
409 maximize humoral immunity to parasitic infections. Moreover, we present a modulator of antibody  
410 responses against parasitic infections, *Nfkbid*, a transcriptional regulator that can tune B cell  
411 responses to provide an overall effective class-switched antibody response against parasites.

412

## 413 **MATERIAL AND METHODS**

### 414 **Parasite strains and cell lines**

415 Human foreskin fibroblasts (HFFs) monolayers were grown in DMEM (4.5 g/L D-glucose) (Life  
416 Technologies) supplemented with 2 mM L-glutamine, 20% fetal bovine serum (FBS) (Omega  
417 Scientific), 1% penicillin-streptomycin, and 0.2% gentamycin (Life Technologies). Mouse  
418 Embryonic Fibroblasts (MEFs) were grown in DMEM (4.5 g/L D-glucose) (Life Technologies)

419 supplemented with 10% fetal bovine serum (FBS) (Omega Scientific), 20mM HEPES, 1%  
420 penicillin-streptomycin, and 0.2% gentamycin (Life Technologies). *Toxoplasma gondii* strains  
421 were passaged in HFFs in ‘Toxo medium’ (4.5 g/L D-glucose, L-glutamine in DMEM  
422 supplemented with 1% FBS and 1% penicillin-streptomycin). The following clonal strains were  
423 used (clonal types are indicated in parentheses): RH  $\Delta ku80 \Delta hxpprt$  (type I), RH (1-1) *GFP::cLUC*  
424 (type I), GT1 (type I), GT1 *GFP::cLuc* (type I), and CEP *hxpprt-* (type III). The following atypical  
425 strains were used: MAS, MAS *GFP::cLuc* (2C8) (haplogroup ‘HG’ HG4), GUY-MAT (HG5),  
426 FOU (HG6), GPHT (HG6), TgCATBr5 (HG7), GUY-DOS (HG10), and VAND (HG10). The  
427 uracil auxotroph vaccine strain, RH  $\Delta up \Delta ompdc$  [60], was passaged in HFFs in medium containing  
428 250 $\mu$ M uracil.

#### 429 **Generation of GFP-expressing GT1 strains**

430 GT1 parasites were transfected with linearized plasmids for parasite expression of GFP and click  
431 beetle luciferase (*GFP::cLUC*), parasites were grown on HFF monolayers in T-25 flasks in Toxo  
432 medium for 2 weeks. Parasites were removed from the flasks by scraping; the parasites were  
433 pelleted and washed with PBS and suspended in sterile FACS buffer (2% FBS in PBS). Fluorescent  
434 parasites were then sorted via fluorescence-activated cell sorting (FACS) into a 96-well plate with  
435 confluent HFF monolayers. To ensure single plaque formation in at least one of the wells, the sort  
436 was titrated using the following parasite numbers: 100, 50, 25, 12, 6, 3, 2, and 1 for each well per  
437 row of 8.

#### 438 **Mice and ethics statement**

439 Female C57BL/6J (H-2b), A/J (H-2a), C57BL/10SnJ (H-2b), B10.A-*H2<sup>a</sup>* *H2-T18<sup>a</sup>*/SgSnJ (H-2a),  
440 B6AF1/J (A/J x C57BL/6J F1 progeny), B6.129S2-*Ighm<sup>tm1Cgn</sup>*/J (muMT), B6.SJL-*Ptprc<sup>a</sup>*  
441 *Pepc<sup>b</sup>*/BoyJ (CD45.1 congenic), B6.Cg-*Gpi1<sup>a</sup>* *Thy1<sup>a</sup>* *Igh<sup>a</sup>*/J (IgH-a triple congenic mice),  
442 C57BL/6J-Chr7<sup>A/J</sup>/NaJ and C57BL/6J-Chr10<sup>A/J</sup>/NaJ (chromosome 7 and 10 consomic mice), and  
443 26 (AxB;BxA) recombinant inbred (RI) mice derived from A/J and C57BL/6 founders, were

444 purchased from Jackson Laboratories. The bumble mouse line used for this research project [32],  
445 C57BL/6J-*Nfkbid*<sup>m1B<sup>tr</sup></sup>/Mmmh, RRID:MMRRC\_036725-MU, was obtained from the Mutant  
446 Mouse Resource and Research Center (MMRRC) at University of Missouri, an NIH-funded strain  
447 repository, and was donated to the MMRRC by Bruce Beutler, M.D., University of Texas  
448 Southwestern Medical Center. Bumble mice were crossed to C57BL/6J to generate F1 bumble  
449 heterozygotes (*Nfkbid*<sup>+/-</sup>).

450 Mice were maintained under specific pathogen free conditions at UC Merced. Every effort  
451 was made to ensure unnecessary stress on the animals was avoided. Mouse work was performed in  
452 accordance with the National Institutes of Health Guide to the Care and Use of Laboratory Animals.  
453 All protocols have been reviewed and approved by UC Merced's Committee on Institutional  
454 Animal Care and Use Committee. UC Merced has an Animal Welfare Assurance filed with OLAW  
455 (#A4561-01), is registered with USDA (93-R-0518), and the UC Merced Animal Care Program is  
456 AAALAC accredited (001318).

#### 457 **Parasite infections**

458 Parasite injections were prepared by scraping T-25 flasks containing vacuolated HFFs and  
459 sequential syringe lysis first through a 25G needle followed by a 27G needle. The parasites were  
460 spun at 400 rpm for 5 min to remove debris and the supernatant was transferred, followed by a spin  
461 at 1700 rpm washing with PBS. For primary infections, mice were infected intraperitoneally (i.p.)  
462 with 10<sup>4</sup> tachyzoites of type III CEP *hxgprt*<sup>-</sup>. For some experiments, mice were vaccinated i.p. with  
463 10<sup>6</sup> tachyzoites of RH *Δup Δompdc*. For secondary infections, mice were infected I.P. with 5x10<sup>5</sup>  
464 type I parasites (RH or GT1). Parasite viability of the inoculum was determined by plaque assay  
465 following i.p. infections. In brief, 100 or 300 tachyzoites were plated in HFF monolayers grown in  
466 a 24-well plate and 4-6 days later were counted by microscopy (4x objective).

#### 467 **Blood plasma isolation and assessment of seroconversion**

468 All mice were assessed for sero-positivity to *T. gondii* 4-5 weeks post primary infection. 50 $\mu$ L of  
469 blood was isolated from mice in tubes containing 5 $\mu$ L of 0.5M EDTA on ice, pelleted and the  
470 supernatant containing blood plasma was heat inactivated to denature complement at 56°C for 20  
471 minutes and then stored at -80°C. HFFs were grown on coverslips and infected with GFP-  
472 expressing RH (1-1) overnight, fixed 18 hrs later with 3% formaldehyde (Polysciences) in PBS,  
473 washed, permeabilized and blocked with PBS containing 3% bovine serum albumin Fraction V  
474 (Sigma), 0.2M Triton X-100, 0.01% sodium azide, incubated with a 1:100 dilution of collected  
475 blood plasma for 2 hrs at room temperature, washed with PBS, and detected with Alexa Fluor 594-  
476 labeled secondary antibodies specific for mouse IgG (cat # A11032, Life Technologies).  
477 Seropositive parasites were observed by immunofluorescence microscopy (Nikon Eclipse Ti-U).

#### 478 **Brain superinfection assays and cyst enumeration**

479 Brains from chronically infected mice (CEP *hxgpirt*-) that survived secondary challenge were  
480 dissected, rinsed in PBS, passed through a 21G needle several times, pelleted and suspended in  
481 1mL of PBS. For rederivation, 100 $\mu$ L of the brain homogenate was used to inoculate HFF  
482 monolayers in Toxo medium. One to two weeks later, infected HFFs were syringe-lysed and plated  
483 on new HFF monolayers to encourage parasite growth. Once HFFs were fully vacuolated, parasites  
484 were passaged in Toxo medium supplemented with mycophenolic acid (MPA) and xanthine that  
485 selects for parasites encoding a functional *HXGPRT* (i.e. the challenging strains) and against the  
486 chronically infecting type III *hxgpirt*- which lacks a functional *HXGPRT* gene. Outgrowth in MPA-  
487 xanthine was considered evidence for superinfection.

488 For counting tissue cysts, 100 $\mu$ L of brain homogenate was fixed in 900 $\mu$ L of ice cold  
489 methanol, incubated for 5 minutes in microtubes (MCT-175-C, Axygen), washed and stained  
490 overnight in a 500 $\mu$ L PBS solution containing 1:150 dilution of FITC-conjugated *Dolichos biflorus*  
491 agglutinin (Vector Laboratories) with slow rotation at 4°C. The stained homogenate was further

492 washed and suspended in 1mL of PBS, of which several 50 $\mu$ L aliquots were counted by  
493 fluorescence microscopy, and the number of cysts per brain were deduced.

#### 494 **Genetic linkage analysis**

495 Quantitative trait loci (QTL) analysis was performed with the package *r/QTL* in R (version 3.6.1).  
496 LOD scores for each marker were calculated using the Haley-Knott regression model with the  
497 function ‘scanone’, or for all possible combination of two markers (i.e. epistatic interactions) using  
498 the function ‘scantwo’. 1000 permutations were performed to obtain the genome wide LOD  
499 threshold for a P value of  $\leq 0.05$ , which was considered statistically significant. Similar results were  
500 obtained with a linear mixed regression model. To estimate the effect each QTL had on the overall  
501 phenotype, the function ‘fitqtl’ was first used to fit the data to a multiple-QTL model. Statistical  
502 support was found for inclusion of all four QTLs with LOD scores  $> 3$  compared to any lesser  
503 combination of three-QTLs (ANOVA  $P < 0.02$ ). Individual QTL effects were then calculated under  
504 the assumption of the four-QTL model, which collectively accounts for 91% of the observed  
505 phenotypic variance.

#### 506 **Cell isolation, *in vitro* recall infections, and FACS analysis**

507 PECs were isolated by peritoneal lavage and splenocytes obtained, as described in [26]. In brief,  
508 4mL of FACS buffer (PBS with 1% FBS) and 3mL of air were injected into the peritoneal cavity  
509 with a 27G needle. After agitation, the PEC wash was poured into a conical tube. PEC washes were  
510 filtered through a 70 $\mu$ m cell strainer, pelleted, and washed with FACS buffer before staining.  
511 Spleens were dissected and crushed through 70 $\mu$ m cell strainers, pelleted, incubated in ACK red  
512 blood cell RBC lysis buffer (0.15M  $\text{NH}_4\text{Cl}$ , 10mM  $\text{KHCO}_3$ , 0.1mM EDTA) for 5 minutes at room  
513 temperature, then washed with FACS buffer. To obtain peripheral blood leukocytes (PBLs), 50 $\mu$ L  
514 of blood was isolated from mice in tubes containing 5 $\mu$ L of 0.5 M EDTA on ice, pelleted and  
515 incubated in ACK lysis buffer, washed and peripheral blood leukocytes (PBLs) were suspended in  
516 FACS buffer.

517 For FACS analysis, all preparations were done on ice, and cells were blocked in FACS  
518 buffer containing Fc Block anti-CD16/32 (2.4G2) (BD Biosciences), 5% normal hamster serum,  
519 and 5% normal rat serum (Jackson ImmunoResearch) for 20 minutes prior to staining with  
520 fluorophore-conjugated monoclonal antibodies (mAbs). The following mAbs (1:100 staining  
521 dilutions) were used: anti-CD1d-BV650 (1B1, BD Bioscience), anti-CD11c-eFlour 450 (N418,  
522 eBioscience); anti-CD11c-eFlour 450 (N418, BD Bioscience); anti-CD45.2-eFlour 450 (104,  
523 eBioscience); anti-CD4-eFlour 450 (GK1.5, eBioscience), anti-CD4-PECy7 (GK1.5, eBioscience);  
524 anti-CD11b-FITC (M1/70, eBioScience), anti-CD11b-BUV395 (M1/70, BD Bioscience), anti-  
525 CD11b-BV421 (M1/70, BD Bioscience), anti-CD11b-Pacific Blue (M1/70, BioLegend); anti-  
526 IFN $\gamma$ -PE (XMG1.2, BD Bioscience); anti-CD8 $\alpha$ -APC (53-6.7, eBioscience), anti-CD8 $\alpha$ -BV510  
527 (53-6.7, BioLegend), anti-Ly6G-APC (1A8-Ly6g, eBioscience), anti-CD19-PerCP-Cy5.5  
528 (ebio1D3, eBioscience), anti-CD19-PE (6D5, BioLegend), anti-CD19-BV785 (6D5, BioLegend),  
529 anti-CD3-eFlour 780 (17A2, BD Biosciences), anti-Ly6C-PECy7 (HK1.4, BioLegend), anti-  
530 CD23-Pacific Blue (B3B4, BioLegend), anti-CD23-AF700 (B3B4, BioLegend), anti-CD21/CD35-  
531 FITC (7E9, BioLegend), anti-CD21/CD35-PE (7E9, BioLegend), anti-CD5-APC (53-7.3,  
532 BioLegend), anti-CD43-BV510 (S7, BD Bioscience), anti-CD43-BUV737 (S7, BD Bioscience),  
533 anti-CD5-PerCP-Cy5.5 (53-7.3, BioLegend), anti-CD5- Cy7-APC (53-7.3, BioLegend), anti-  
534 CD45R/B220-Cy7-APC (RA3-6B2, anti-CD45R/B220-BUV-661 (RA3-6B2, BD Bioscience),  
535 anti-CD73-Cy7-PE (eBioTY/11.9, eBioscience), anti-CD80-BV711 (16-10A1, BioLegend), anti-  
536 FCRL5-af88 (polyclonal, R&D systems) anti-IgM-PECy7 (RMM-1, BioLegend), anti-IgM-  
537 BV605 (RMM-1, BioLegend), anti-IgD-FITC (11-26c.2a, BioLegend), anti-IgD-PEDazzle (11-  
538 26c.2a, BioLegend), anti-CD138/Syndecan-1-BV510 (281-2, BD Bioscience), anti-  
539 CD138/Syndecan-1-BV650 (281-2, BioLegend), anti-mouse-CD267/TACI-AlexaFlour-647  
540 (8F10, BD Biosciences), and anti-CD268/BAFF-R-PE (7H22-E16, BioLegend). Other FACS  
541 reagents included the viability dye propidium iodide (Sigma) at a final concentration of 1 $\mu$ g/mL.

542 For *in vitro* recall, splenocytes and PerC were isolated from chronic and challenged mice  
543 (day 5 or 7 following secondary infection) and  $6 \times 10^5$  cells per well (96-well plate) were plated in  
544 T cell medium (RPMI 1640 with GlutaMAX, 20% FBS, 1% Pen/Strep, 1mM NaPyruvate, 10mM  
545 HEPES, 1.75 $\mu$ l BME). Cells were infected with a type I strain (RH or GT1) strain at an MOI  
546 (multiplicity of infection) of 0.2 for 18 hr; 3 $\mu$ g/mL brefeldin A (eBioscience) was added for the  
547 last 5 hr of infection. 96-well plates were placed on ice, cells were harvested by pipetting and  
548 washed with FACS buffer, blocked, and stained for surface markers. Cells were fixed with BD  
549 Cytofix/Cytoperm and permeabilized with BD Perm/Wash solution (cat# 554714, BD  
550 Pharmingen), stained with anti-IFN $\gamma$ -PE (XMG1.2, BD Bioscience), anti-GZB (GB11, BioLegend)  
551 and anti-IL-2-APC (JES6-5H4, BioLegend) on ice for 1 hr or overnight. Cells were then washed  
552 once with BD Perm/Wash solution, once in FACS buffer, and analyzed by FACS.

553 For FoxP3 staining, peritoneal lavage was performed on chronic and challenged (day 7  
554 following secondary infection) bumble and WT mice. Cells were washed and surface stained.  
555 Fixation and permeabilization was performed with the eBioscience Foxp3/Transcription Factor  
556 Staining Buffer Set (cat # 00-5523-00) before intracellular staining with anti-Foxp3-PE (MF-14,  
557 BioLegend) according to the manufacturer's recommendations. Flow cytometry was performed on  
558 a Beckman Coulter Cytoflex LX, LSR II (BD Biosciences), or the Bio-Rad ZE5 and analyzed with  
559 FlowJo<sup>TM</sup> software.

560 For intracellular staining of IgG H/L PerC and splenocytes were surface stained with anti-  
561 CD43-BV510 (S7, BD Bioscience), anti-CD19-PE (6D5, BioLegend), anti-IgD-FITC (11-26c.2a,  
562 Biolegend), anti-IgM-PE/Cy7 (RMM-1, BioLegend), anti-CD5-APC (53-7.3, BioLegend), anti-  
563 CD45R/B220-Cy7-APC (RA3-6B2). Cells were then fixed with BD Cytofix/Cytoperm and  
564 permeabilized with BD Perm/Wash solution (cat# 554714, BD Pharmingen), stained with anti-  
565 IgG(H+L)-a350 (Polyclonal, Invitrogen) for 30 minutes. Cells were then washed once with BD  
566 Perm/Wash solution, once in FACS buffer, and analyzed by FACS.

567 **Analysis of isotype-specific antibody reactivity to *Toxoplasma gondii* by flow cytometry**

568 For serum reactivity analysis, syringe-lysed GFP-expressing strains (RH1-1 and GT1-GFP) were  
569 fixed in 3% formaldehyde for 20 minutes, washed twice in PBS, and plated in 96 well micro-titer  
570 plates at  $4 \times 10^5$  parasites/well. The parasites were then incubated with serum from chronically  
571 infected mice, at serum concentrations ranging from  $10^{-2}$  to  $10^{-6}$  diluted in FACS buffer, for 20  
572 minutes at 37°C. Parasites were then washed with FACS buffer and placed on ice for incubation  
573 with anti-isotype detection antibodies depending on application: anti-IgG3-BV421 (R40-82, BD  
574 Bioscience), anti-IgM-PE/Cy7 (RMM-1, BioLegend), anti-IgG1-FITC (RMG1-1, BioLegend),  
575 anti-IgG1-APC (RMG1-1, BioLegend), anti-IgG2b-FITC (RMG2b-1, BioLegend), anti-IgG2b-PE  
576 (RMG2b-1, BioLegend), anti-IgG2a-FITC (RMG2a-62, BioLegend), anti-IgG2a-PerCP/Cy5.5  
577 (RMG2a-62, BioLegend), anti-IgM-a-PE (DS-1, BD Bioscience), Anti-IgM-b-PE (AF6-78, BD  
578 Bioscience).

579 **Parasite neutralization assay**

580 Heat-inactivated serum was used to coat live parasites for 20 minutes at 37°C before infecting  
581  $5 \times 10^5$  mouse embryonic fibroblasts/well (MEFs) in 96 well plates. Immediately following addition  
582 of parasite to MEF wells, plates were spun at 1200rpm for 3 minutes to synchronize infection. 2  
583 hrs after initiation of infection, cells were placed on ice and harvested by scraping with pipette tips.  
584 Cells were washed twice in FACS buffer, suspended in 1:1000 PI in FACS buffer, and then  
585 analyzed by flow cytometry.

586 **SDS-PAGE and immunoblotting for parasite lysate antigen**

587 To generate parasite lysate antigens *Toxoplasma gondii* was cultured in HFF and expanded to  
588 approximately  $2 \times 10^8$  parasites. Parasites were syringe-lysed, washed with sterile 1X PBS and the  
589 parasite pellet was lysed with (1mL) 0.1% TritonX-100 detergent in 1X PBS. Solubilized parasites  
590 were centrifuged at 2,000 RCF for 20 minutes to remove large debris. The supernatant was  
591 aliquoted and stored at -80°C. Parasite lysate was reduced with  $\beta$ -mercaptoethanol (BME) and



592 separated via SDS-PAGE in 4-20% Mini-PROTEAN TGX pre-cast gels (cat # 4561096, Bio-Rad)  
593 before transfer to PVDF membrane using a Trans-Blot Turbo Mini PVDF Transfer Pack (cat #  
594 1704156, Bio-Rad) via Bio-Rad Transblot Turbo (cat # 1704150, Bio-Rad). Membranes were  
595 blocked with 10% fortified bovine milk dissolved in Tris-Buffered Saline with 0.1% Tween (TBS-  
596 T 0.1%) for 1-2 hrs at room temperature or overnight at 4°C. Blots were then probed with heat-  
597 inactivated serum in block at either 1:1,000 dilution for serum IgM analysis or 1:5,000 dilution for  
598 serum IgG analysis overnight at 4°C. Membranes were washed with TBS-T 0.1% three times for  
599 20 minutes per wash. Blots were then incubated for one hr at room temperature with goat  $\alpha$ -mouse  
600 horseradish peroxidase (HRP)-conjugated antibodies (SouthernBiotec): anti-IgM secondary 1:1000  
601 (cat# 1020-05) and total anti-IgG secondary 1:5000 (cat# 1030-05). Membranes were then washed  
602 with TBS-T 0.1% three times and developed with Immobilon® Forte Western HRP Substrate  
603 (WBLUF0500). All blots were imaged via chemiluminescence on a ChemiDoc Touch (cat#  
604 12003153, Bio-Rad). Image Lab 6.1 software (Bio-Rad) was used for analysis of bands and total  
605 lane signal. Western blots comparing A/J to C57BL/6J were developed simultaneously and the  
606 band signal was normalized to A/J.

#### 607 **RNA isolation and sequencing**

608 Peritoneal B-1a (B220<sup>int-neg</sup> CD19<sup>high</sup> CD11b<sup>+</sup> CD5<sup>+</sup> PI-), B-1b (B220<sup>int-neg</sup> CD19<sup>high</sup> CD11b<sup>+</sup> CD5-  
609 PI-), or B-2 B cells (B220<sup>high</sup> CD19<sup>+</sup> CD11b<sup>-</sup> PI-) were sorted into 500ul RNeasy lysis buffer using  
610 a FACS ARIA II cell sorter (BD Biosciences). RNA was purified using the RNeasy mini kit (cat#  
611 74134, Qiagen) according to the manufacturer's protocol. RNA purity was tested by Qubit  
612 (ThermoFisher) and Agilent 2100 BioAnalyzer for total RNA with picogram sensitivity. DNA  
613 libraries were generated with a Lexogen QuantSeq-UMI FWD 3' mRNA-Seq Library Prep Kit  
614 (cat# 015). Samples were sent to UC Davis for QuantSeq 3' mRNA FWD-UMI sequencing.

#### 615 **Gene expression analysis and data availability**

616 Raw reads were trimmed and mapped by the BlueBee genomic pipeline FWD-UMI Mouse  
617 (GRCm38) Lexogen Quantseq 2.6.1 (Lexogen). In brief, reads were quality controlled with  
618 ‘FASTQC’, trimmed with ‘Bbduk’ to remove low quality tails, poly(A)read-through and adapter  
619 contaminations, read alignments to the *Mus musculus* genome build GRCm38 were done with  
620 ‘STAR’, and gene reads were quantified with ‘HTSeq-count’. Differentially expressed gene (DEG)  
621 analysis was performed utilizing limma-voom in R version 3.6.3 in RStudio with Bioconductor  
622 suite of packages. Heatmaps were generated with ‘gplots’. Pathway and GO term analysis was  
623 performed with MouseMine (mousemine.org), and gene set enrichment analysis was performed  
624 with GSEA v4.0.3. RNA-sequencing data generated in this study has been deposited in the NCBI  
625 Sequence Read Archive (Bioproject accession number PRJNA637442). All other data that support  
626 the findings herein are available from the corresponding author upon reasonable request.

#### 627 **LPS-stimulation of enriched B cells and quantitative PCR**

628 PerC and splenocytes were isolated from naïve 6-8 week-old C57BL/6J and A/J mice and enriched  
629 for B cells using the EasySep Mouse Pan B cell Isolation Kit (cat#19844, StemTech). Bead  
630 enrichment for splenic samples had the addition of biotinylated anti-CD43 antibodies (clone S7,  
631 BD Bioscience) to remove B-1 cells. Enriched samples were plated in a 96-well plate at 400,000  
632 cells per well and stimulated with 25ug/ml of LPS (cat# L4391-1MG, Sigma). After 2 hrs, total  
633 RNA was isolated using the Rneasy Mini Kit (cat# 74134) and cDNA was synthesized using High  
634 Capacity cDNA Reverse Transcription Kit (ThermoFisher, cat#4368814). Quantitative PCR was  
635 performed on synthesized cDNA samples using ThermoFisher TaqMan Master Mix (cat# 4444556)  
636 and TaqMan probes: *Actb* - Assay ID:Mm02619580\_g1 (cat# 4331182), and *Nfkbid* - Assay ID:  
637 Mm00549082\_m1 (cat# 4331182), according to the manufacturer’s protocol. Normalization of  
638 *Nfkbid* expression in each sample was calculated in comparison to *Actb* expression levels. Fold  
639 change in *Nfkbid* expression of AJ relative to that of C57BL/6J cells was determined through the  
640 delta delta CT method ( $2^{-\Delta\Delta CT}$ ).

641 **PerC adoptive transfers and IgH allotype chimeric mouse generation**

642 PerC was harvested by peritoneal lavage of 6-12 week old C57BL/6J donor mice as described  
643 above and  $5 \times 10^6$  total peritoneal exudate cells (total PerC)/60ul PBS dose were transferred i.p. into  
644 2-4 day old bumble neonates. Allotype chimeric mouse generation was performed as previously  
645 described [45]. In brief, 1-day old C57BL/6J neonates were treated with 0.1mg of anti-IgM-b (clone  
646 AF6-78) and twice weekly thereafter treated with 0.2mg of anti-IgM-b for 6 weeks. On day 2 after  
647 birth the neonates were given  $5 \times 10^6$  total PerC from B6.Cg-*Gpi1<sup>a</sup> Thy1<sup>a</sup> Igh<sup>a</sup>* delivered i.p. The  
648 mice were then allowed to rest for 6 weeks after the last antibody treatment before infection with  
649 *T. gondii*.

650 **Bone marrow chimeric mice generation**

651 B6.SJL-*Ptprc<sup>a</sup> Pepc<sup>b</sup>*/BoyJ, bumble, and C57BL/6J recipient mice were given 2 doses of 500cGy  
652 with an X-Rad320 (Precision X-Ray) with a 4 hr interval. Donor BM cells were harvested from  
653 bumble and WT C57BL/6J mice, filtered with a 70um filter, incubated in ACK red blood cell lysis  
654 buffer, washed with PBS and transplanted by retro-orbital injection at a concentration of  $10^7$   
655 cells/200ul PBS dose. For BM chimeras reconstituted with PerC,  $5 \times 10^6$  total PerC from WT  
656 C57BL/6J mice were transferred I.P. Recipient mice were then allowed to rest for 8 weeks.  
657 Reconstitution was assessed at 8 weeks by FACS analysis of PBL.

658 **ELISA**

659 High-affinity protein binding microplates (Corning) were coated overnight goat anti-mouse IgM  
660 (1mg/ml, Southern Biotech, cat# 1021-01) and blocked with coating buffer containing with 1%  
661 BSA (w/v) and 2% goat serum (Omega Scientific) in PBS. Wells were washed with ELISA wash  
662 buffer (1X PBS, 0.05% Tween<sup>TM</sup>-20). Mouse serum samples were diluted 1:400 in coating buffer  
663 and incubated in the wells for 1 hr. Wells were washed 5 times and secondary goat anti-IgM-HRP  
664 (Southern Biotech, cat# 1021-08) at 1:5000 dilution was incubated for 1 hr in the wells. Wells were  
665 washed several times and developed with TMB substrate (Invitrogen). Development was stopped

666 after 20 minutes with 1M H<sub>3</sub>PO<sub>4</sub> stop solution. Absorbance was measured at 450nm on a BioTek  
667 Epoch microplate spectrophotometer.

## 668 **Statistics**

669 Statistical analysis was performed with Graphpad Prism 8 software. Statistical significance was  
670 defined as  $P < 0.05$ . P values were calculated using paired or unpaired two-tailed t-tests, 2-way  
671 ANOVA with Tukey multiple comparison correction, and multiple t-tests with the Holm-Sidak  
672 correction for multiple comparisons. Survival curve significance was calculated using log-rank  
673 (Mantel-Cox) testing. Significance in time to death was calculated using the Gehan-Breslow-  
674 Wilcoxon test. Differential gene expression analysis statistics were calculated using the Limma-  
675 Voom R package, P values were adjusted with the Benjamini-Hochberg correction for multiple  
676 comparisons. GO term and pathway enrichment analysis statistics were performed at  
677 mousemine.org using the Holm-Bonferroni test correction. Statistical methods used for each figure  
678 are indicated in the figure legends.

679

## 680 **ACKNOWLEDGMENTS**

681 This work was supported by NIH grants R01 AI137126, R15 AI131027, a Hellmann Fellowship  
682 and an MCB departmental award to KJ; and by NIH grants U19-AI109962 and R01 AI117890 to  
683 NB. The sequencing was carried out at the DNA Technologies and Expression Analysis Cores at  
684 the UC Davis Genome Center, supported by NIH Shared Instrumentation Grant 1S10OD010786-  
685 01. We would like to thank David Gravano and the UC Merced Stem Cell Instrumentation Foundry  
686 for their assistance designing panels and utilizing instruments, supported by the DoD Research and  
687 Education Program for HBCU/MSI Instrumentation Grant W911NF1910529. The authors declare  
688 no conflict of interest.

689

690 **Author Contributions:** S.P.S., S.D.S., N.B. and K.J. designed research; S.P.S., S.D.S., J.A.,  
691 J.C.S.A., J.W., S.W., and K.J. performed research; Z.L. and N.B. contributed new  
692 reagents/analytic tools; S.P.S., S.D.S., and K.J. analyzed data; and S.P.S., S.D.S., N.B. and K.J.  
693 wrote the paper.

694 **Competing Interest Statement:** The authors disclose no competing interests.

695

696

697 **FIGURE AND TABLE LEGENDS**

698

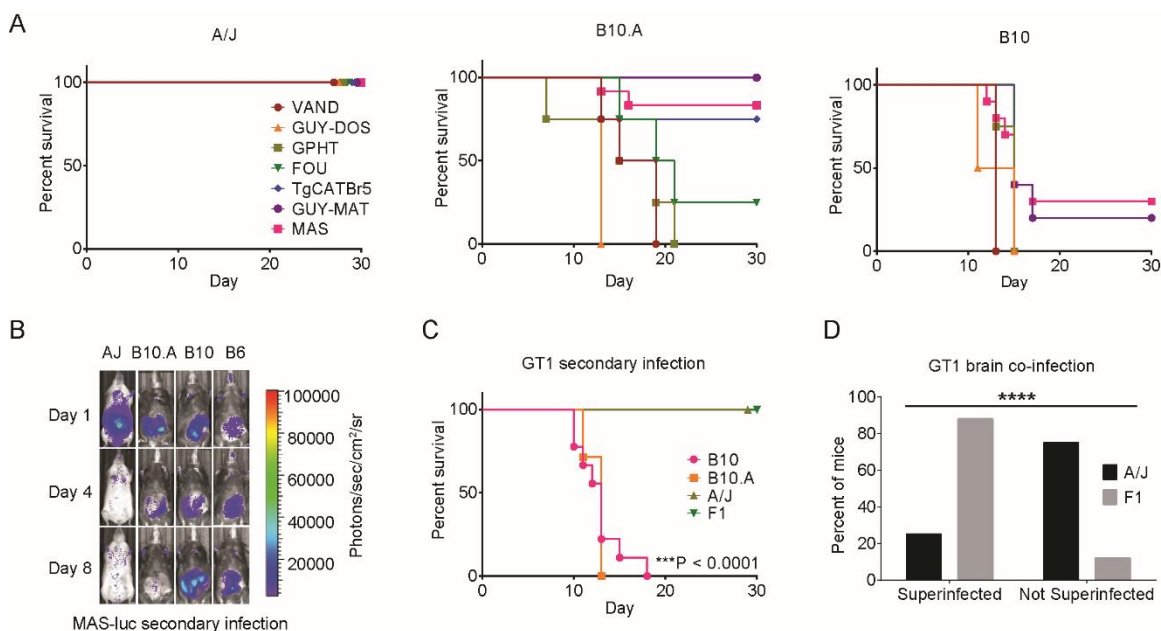

699

700 **Figure 1. MHC and non-MHC alleles promote immunity to virulent *Toxoplasma gondii***  
 701 **strains in A/J mice.**

702 All mice were infected with  $10^4$  type III CEP *hxgprt*- avirulent *T. gondii* parasites and allowed to  
 703 progress to chronic infection; then, 35 days later, mice were challenged with  $5 \times 10^4$  of the indicated  
 704 strains of *T. gondii*. A) Survival of A/J, C57BL/10J (B10), and C57BL/10J.A (B10.A) mice  
 705 following secondary infection with atypical strains of *T. gondii*. Cumulative results are plotted from  
 706 1-2 experiments; n=4 to 12 mice per parasite strain and mouse genetic background. B)  
 707 Bioluminescence imaging of individual mice challenged with luciferase expressing MAS strain on  
 708 days 1, 4 and 8 of secondary infection; parasite burden is shown as a heat map depicting the relative  
 709 number of photons (photons/sec/cm<sup>2</sup>/sr) detected over a 5 minute exposure. C) Survival of B10  
 710 (n=5), B10.A (n=5), A/J (n=12), and F1 (A/J x C57BL/6, n=9) mice following secondary infection  
 711 with the type I GT1 strain; \*\*\*P<0.0001, Log-rank (Mantel-Cox) compared to A/J mice.  
 712 Cumulative data from 1 to 2 experiments are plotted. D) Superinfection in surviving A/J (n=12)  
 713 and F1 (n=9) mice following 35 days of secondary infection with the type I GT1 strain. To evaluate

714 superinfection, brain homogenate was grown in MPA-xanthine selection medium, which selects  
715 for GT1 parasites expressing the endogenous *HXGPRT* locus and against the *hxgprrt*- type III CEP  
716 strain used to induce chronic infection. Plotted is the fraction of mice for which the presence or  
717 absence of the GT1 strain was detected; \*\*\*\*  $P < 0.0001$ , Fisher's exact test.

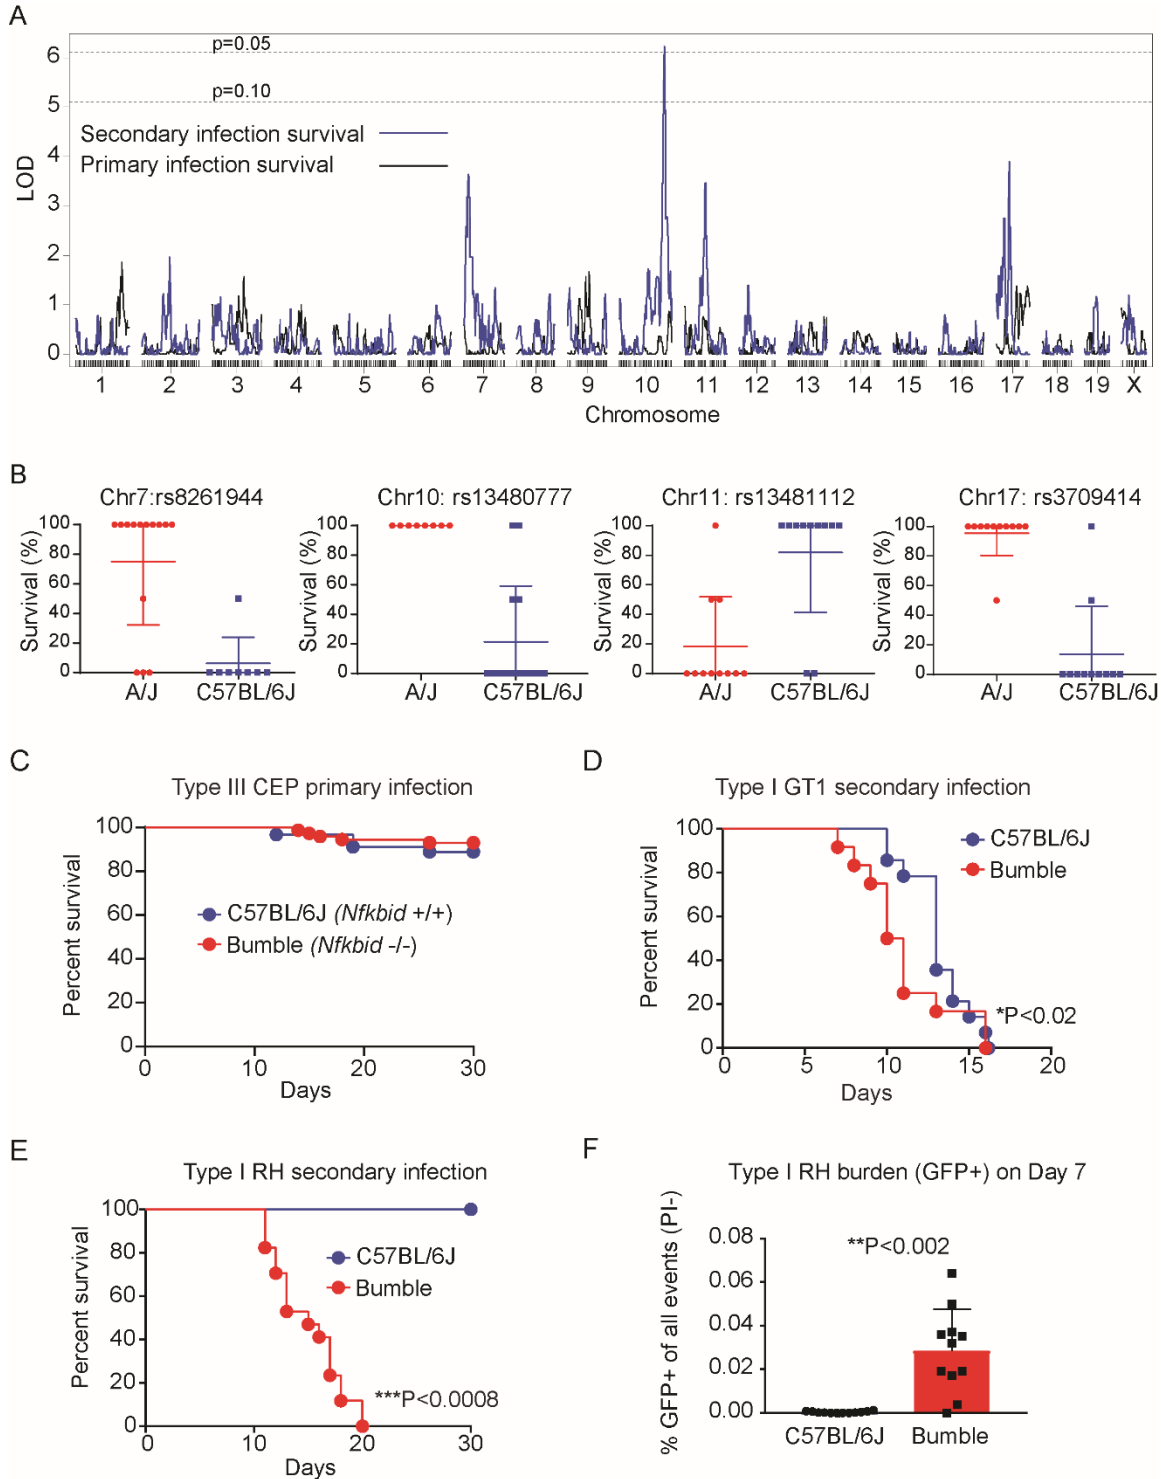

718  
719  
720  
721



722 **Figure 2. Genetic mapping reveals *Nfkbid* is required for immunity to *Toxoplasma gondii***  
723 **secondary infections.**

724 26 recombinant inbred (RI) mouse strains from the AxB;BxA panel were primed with  $10^4$  type III  
725 *T. gondii* CEP *hxgprt*- parasites; then, 35 days later, mice were challenged with  $5 \times 10^4$  virulent type  
726 I GT1 *T. gondii* parasites (n=2 per RI line). A) LOD scores for each marker were calculated using  
727 Haley-Knott regression and the running LOD scores of primary (black) and secondary infection  
728 survival (blue) for each genetic marker is plotted. 1000 permutations were performed to obtain the  
729 genome wide threshold LOD values; P=0.10 and 0.05 thresholds are shown. B) Effect plots for the  
730 genetic markers closest to the maximal LOD scores calculated for the chromosome 7, 10, 11 and  
731 17 QTLs are shown. Each dot indicates the percent survival of a unique RI line and whether it  
732 encodes an A/J (red) or C57BL/6 (blue) allele at the specified genetic marker. C) Cumulative  
733 survival of bumble (*Nfkbid*<sup>-/-</sup> C57BL/6) (n=71) and wildtype (C57BL/6J) (n=89) naïve mice  
734 infected with the avirulent type III CEP strain. D) Survival of chronically infected bumble (n=12)  
735 and wildtype (n=8) mice given a secondary infection with the type I GT1 strain. Cumulative  
736 survival from 3 separate experiments are shown; \* P<0.02, Gehan-Breslow-Wilcoxon test. E) As  
737 in B, but survival to secondary infection with the type I RH strain is shown. Cumulative survival  
738 from 3 separate experiments is plotted (bumble n=17, C57BL/6J n=4); \*\*\*P<0.008, Mantel-Cox  
739 test. F) Frequency of GFP+ events in the peritoneal lavage 7 days post-secondary infection with  
740 GFP-expressing type 1 RH strain (RH 1-1). Each dot represents the result of one mouse, and  
741 cumulative results are shown from 3 separate experiments (bumble n=13, C57BL/6J n=17);  
742 \*\*P<0.002, unpaired two-tailed t-test.

743

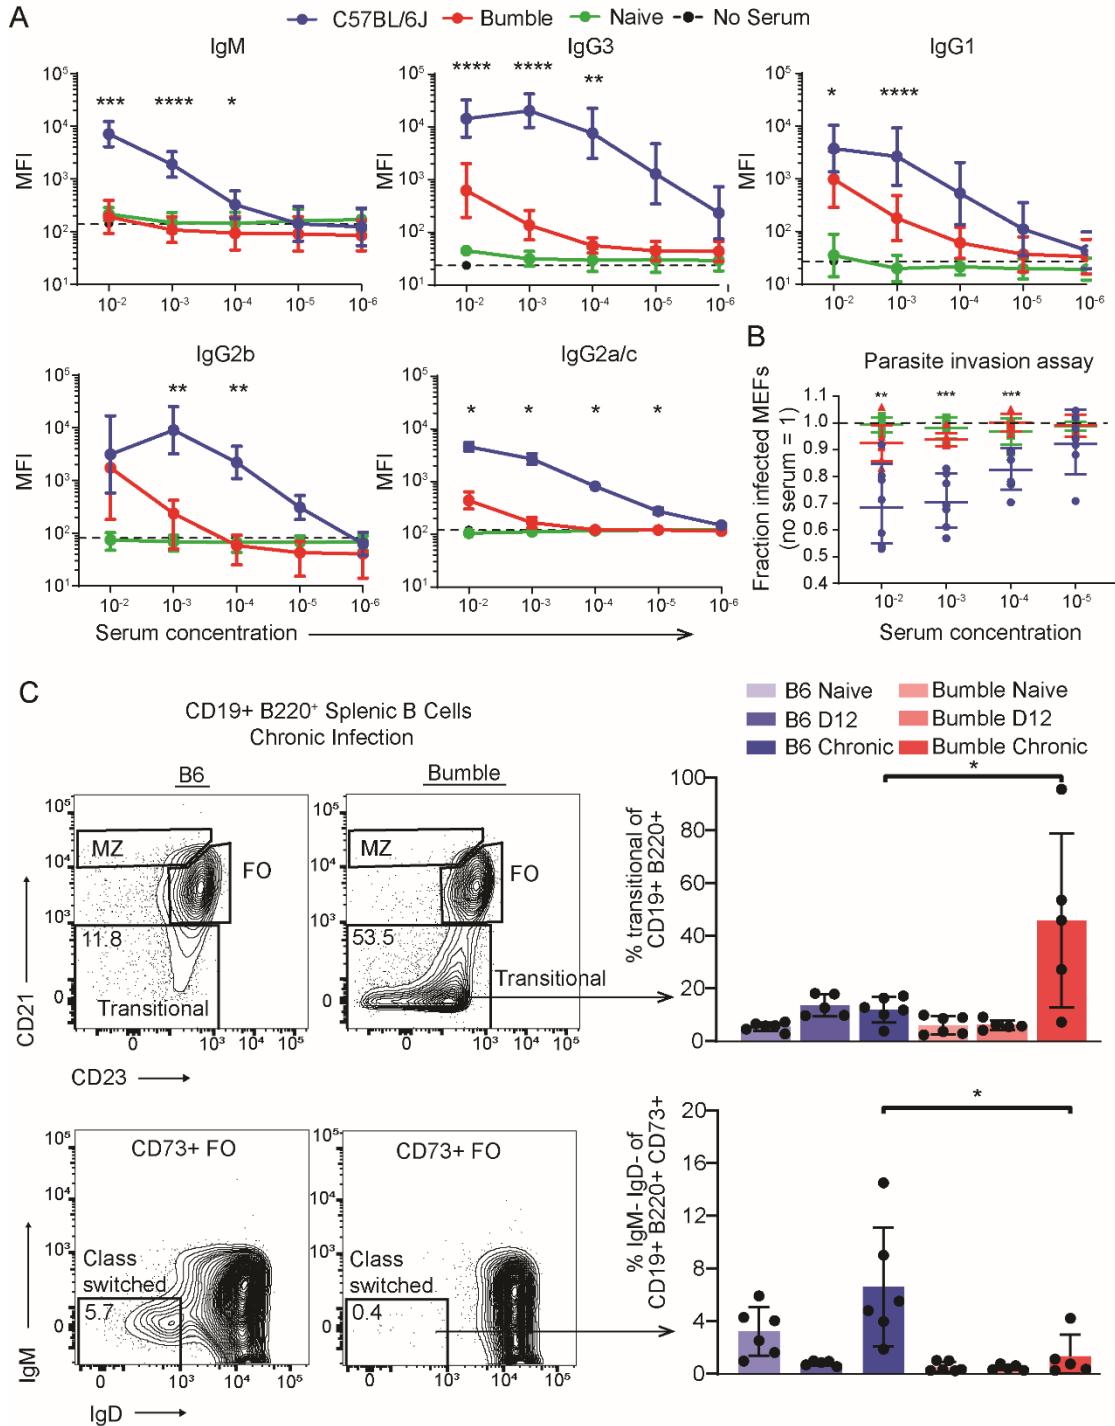

745 **Figure 3. *Nfkbid* is required for humoral responses to *Toxoplasma gondii*.**

746 A) Whole fixed GFP<sup>+</sup> parasites were incubated with serum from chronically infected mice, stained  
747 with fluorescently labeled anti-isotype antibodies and assessed by flow cytometry. Quantification  
748 of *T. gondii*-specific antibody isotype binding (IgM, IgG1, IgG2a/c, IgG2b, and IgG3) over a range  
749 of serum concentrations is shown. Background staining in the absence of serum is indicated by the  
750 dotted line for each isotype. Plotted is the cumulative average  $\pm$ SD of the geometric mean  
751 fluorescence straining intensity (MFI) from 3 separate experiments (bumble n=8, C57BL/6J n=11).  
752 B) Neutralization of GFP<sup>+</sup> parasites coated with serum over a range of concentrations from the  
753 indicated chronically infected mice. Parasites were incubated in serum for 20 minutes before  
754 infection of mouse embryonic fibroblasts and assessed by FACS 2h later. The fraction of infected  
755 host cells (GFP<sup>+</sup> cells) is normalized to that of parasite infections without serum. Each dot  
756 represents the serum from an individual mouse and cumulative results from 3 separate experiments  
757 are shown (bumble n=8, C57BL/6J n=7, naïve n=6). For A and B, significance was assessed by  
758 unpaired t-tests with Holm-Sidak correction for multiple comparisons; \*\*\* P< 0.001, \*\* P<0.01, \*  
759 P<0.01. C) Representative FACS plots of chronically infected bumble and B6 mice and scatter plot  
760 of the frequency of splenic B-2 cell compartments quantifying transitional B cells at naïve, d12 of  
761 primary infection, and chronic infection. Representative FACS plots of chronically infected bumble  
762 and B6 mice and scatter plot of the frequency of IgM<sup>-</sup> IgD<sup>-</sup> cells of the CD73<sup>+</sup> conventional  
763 memory B population. Cumulative data from two experiments n=5-6 mice/condition. \* P<0.05 by  
764 unpaired two-tailed t-test.

765

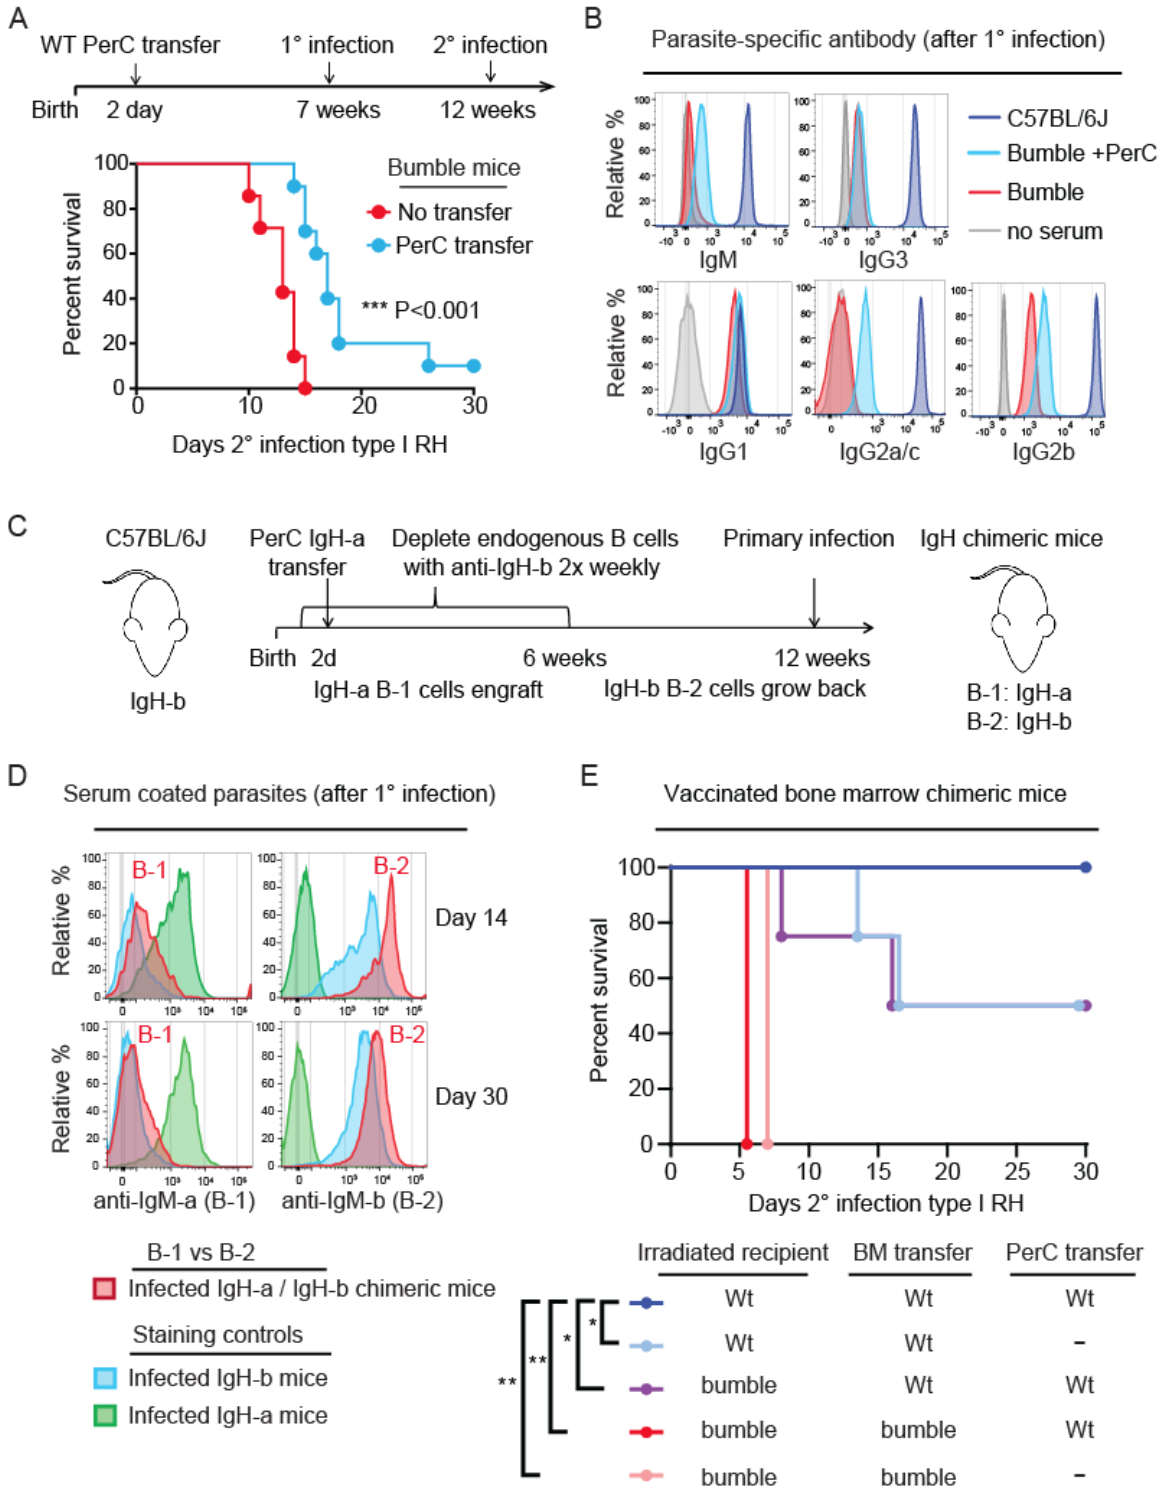

767 **Figure 4. The contribution of B-1 and B-2 cells to *Toxoplasma gondii* immunity in C57BL/6J**  
768 **mice.**

769 A) Schematic of the secondary infection experiment using PerC reconstituted bumble mice. 2-4  
770 day old bumble neonates were transferred  $5 \times 10^6$  total PerC and allowed to rest for 7 weeks before  
771 primary infection with the type III CEP strain. 5 weeks post-primary infection, mice were given a  
772 secondary infection with the type I strain RH. Survival of bumble mice given total PerC transfers  
773 (n=10) relative to littermate controls (n=12). Cumulative survival is shown from 3 separate  
774 experiments; \*\*\* P < 0.001, Mantel-Cox test. B) Representative histograms of anti-isotype staining  
775 of parasites coated in serum ( $10^3$  dilution for IgG,  $10^2$  for IgM) from chronically infected bumble,  
776 bumble given PerC transfer, and WT mice. C) Schematic of neonatal allotype chimera generation.  
777 C57BL/6J neonates were given anti-IgHb to deplete endogenous B cells at day 1 post birth and  
778 twice weekly after for 6 weeks, thereby depleting the endogenous B-1 pool for the life of the animal  
779 due to their restricted fetal/neonatal window of development. Neonates were given  $5 \times 10^6$  total PerC  
780 from 6-8 week old IgH-a congenic C57BL/6 mice donors. These mice then rested for 6 weeks after  
781 the last depletion treatment to allow reemergence of the endogenous B-2 IgH-b cells. D)  
782 Representative histograms of serum derived anti-IgM-a (B-1 derived) or anti-IgM-b (B-2 derived)  
783 staining profiles of type I RH GFP+ parasites taken from the IgH allotype chimeras on day 14 and  
784 30 following primary type III CEP infection. Staining controls with serum from chronically  
785 infected C57BL/6J IgH-b littermates, or IgH-a mice are shown. E) Irradiated bumble and WT  
786 recipients (45.1 or 45.2) were given WT or bumble bone marrow (BM) with or without total WT  
787 PerC (45.2). Mice were vaccinated with a replication deficient type I strain (RH *Δup Δompdc*) and  
788 30d later challenged with type I RH. Cumulative survival is shown from 2-3 experiments (n=4-9  
789 per condition); \* P < 0.05 by Mantel-Cox test.

790

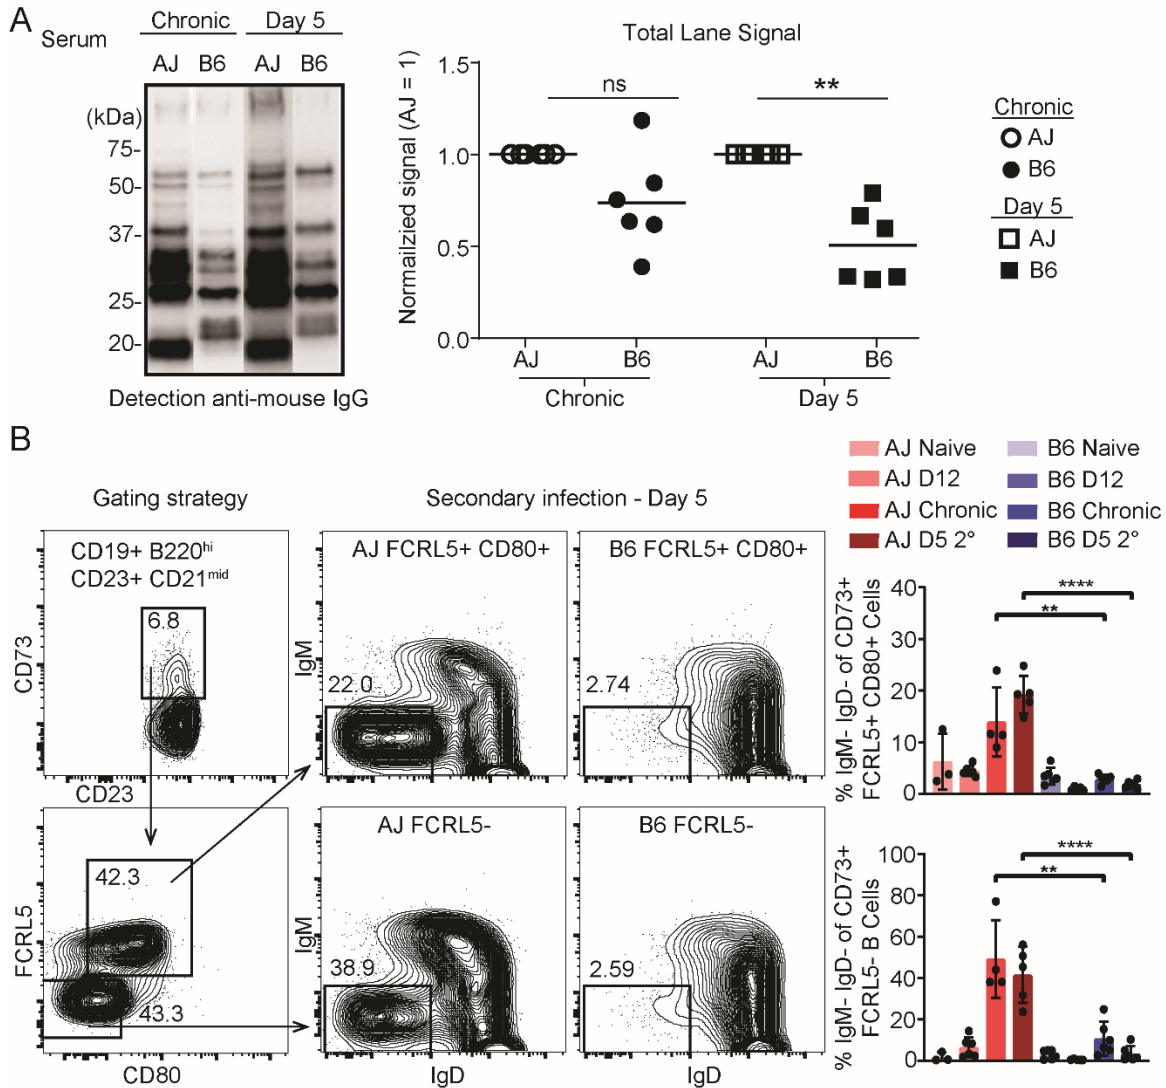

800 CD19+ B220+ CD23+ CD21<sup>mid</sup> CD73+. Conventional memory B cells are FCRL5- CD80- while  
801 atypical memory B cells are identified as FCRL5+, CD80+. Representative FACS plots of memory  
802 compartments in A/J and C57BL/6J mice on day 5 of secondary infection with the type I GT1 strain  
803 are shown. The frequency of class-switched (IgM- IgD-) memory cells at the indicated infection  
804 states were analyzed. Each dot represents the results from an individual mouse and the cumulative  
805 averages +SD from 2 experiments are plotted. N=3-6 mice per infection state. Significance was  
806 assessed with an unpaired two-tailed t-test; \*\*\* P<0.0001, \*\* P<0.01.  
807

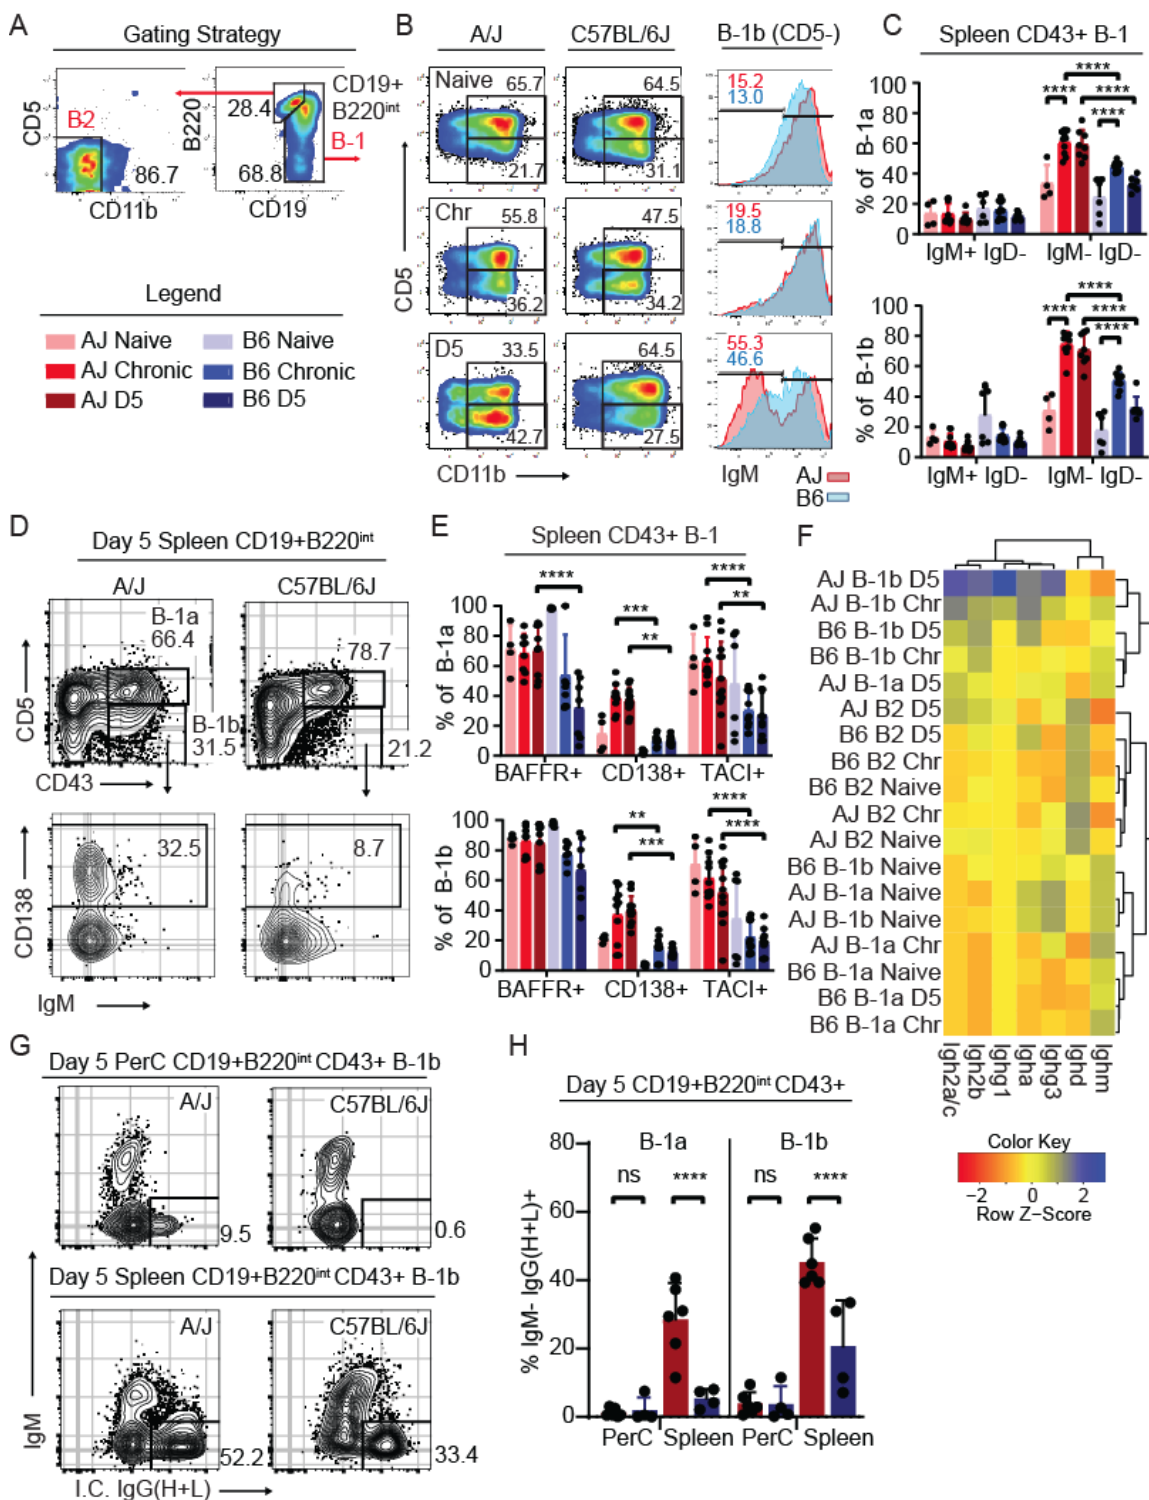

808

809



810 **Figure 6. Evidence for enhanced B-1 cell activation in resistant A/J mice.**

811 A) Gating strategies for identifying B-1 (CD19+ B220<sup>int-neg</sup>) and B-2 (CD19+ B220<sup>hi</sup>) B cells. The  
812 legend applies to panels C-H. B) Representative FACS plots of the CD11b+ peritoneal B-1 B cell  
813 compartment in A/J and C57BL/6J (B6) mice at naïve, chronic (Chr), and 5 days (D5) post-  
814 secondary infection with the GT1 strain. Numbers indicate the percent of cells that fall within the  
815 indicated gate. Representative histograms of IgM surface expression and percent of cells that fall  
816 within the IgM<sup>lo</sup> gate of CD5- B-1b cells from A/J (red) and C57BL/6J (blue) at the indicated time  
817 points. C) Frequencies of splenic CD43+ B-1a (CD5+) or B-1b (CD5-) that are IgM+IgD- or IgM-  
818 IgD- in A/J and C57BL/6J mice at the indicated infection states. D) Representative FACS plots of  
819 splenic CD19+ B220<sup>int-neg</sup> B cells stained for CD43 and CD5 in A/J and C57BL/6J mice at D5 of  
820 secondary infection. Representative CD138 expression on CD5- CD43+ B-1b cells. E) Frequencies  
821 of CD43+ splenic B-1a and B-1b cells from A/J and C57BL/6J mice that express BAFFR+, TACI+,  
822 or CD138+ at the indicated infection states. F) Heatmap depicting the relative expression of all  
823 *Ighg* transcripts from the indicated B cell population, mouse strain and infection state. G)  
824 Representative FACS plots of intracellular IgG (H+L) of B-1b cells, and H) frequency of both  
825 peritoneal and splenic B-1a and B-1b cells of A/J and C57BL/6J mice at day 5 of secondary  
826 infection. For C, E and H, the cumulative average +SD from 2-4 experiments is plotted and each  
827 dot represents the result from an individual mouse; P values calculated by 2-way ANOVA with  
828 Tukey correction; \*\*\*\* P<0.0001, \*\*\* P<0.001, \*\* P<0.01, \* P<0.05.

829

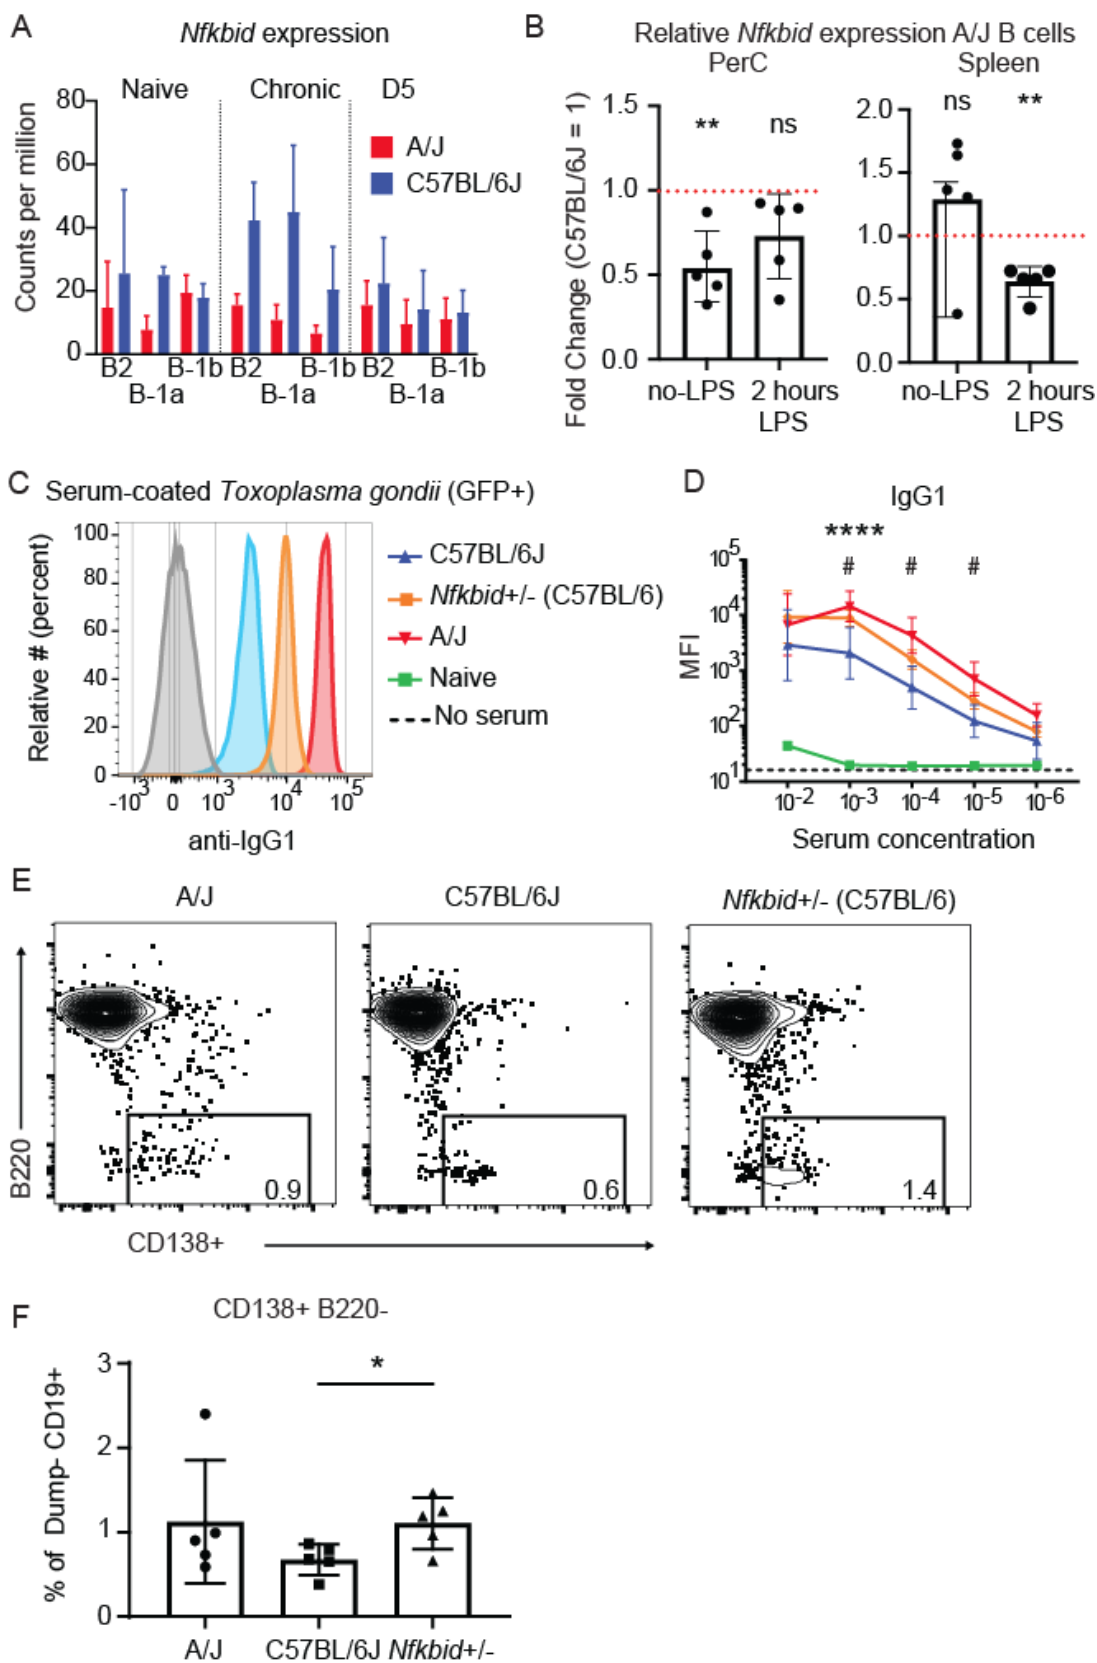

831 **Figure 7. Gene dosage of *Nfkbid* impacts parasite-specific IgG1 responses.**

832 A) *Nfkbid* expression in CPM (Counts per million) of 3'-Tag RNA-seq reads of the indicated B cell  
833 populations obtained from A/J and C57BL/6J mice that were either naïve, chronically infected, or  
834 on D5 of secondary infection with the type I GT1 strain. B) Enriched B cells from the PerC and  
835 spleen were stimulated with LPS for 2 hrs and *Nfkbid* transcripts were quantified by qPCR; \*\* P<  
836 0.01, paired t-test. C) Representative histograms display the detection of parasite-specific IgG1  
837 bound to formaldehyde fixed GFP+ type I GT1 parasites; diluted serums (10<sup>3</sup>) from C57BL/6J,  
838 *Nfkbid*<sup>+/-</sup> (C57BL/6J x bumble F1), and A/J mice chronically infected with the type III CEP strain  
839 were assayed. Anti-mouse IgG1 background staining in the absence of serum is shown. D) As in  
840 C, but quantification of the parasite-specific IgG1 antibody isotype binding over a range of serum  
841 concentrations is shown. Plotted is the cumulative average +/-SD of the MFI from 2-3 separate  
842 experiments (C57BL/6J n=8; *Nfkbid*<sup>+/-</sup> n=7; A/J n=8); significance was assessed by unpaired t-  
843 tests and Holm-Sidak corrections comparing A/J vs C57BL/6J (\*) or *Nfkbid*<sup>+/-</sup> vs C57BL/6J (#);  
844 \*\*\*\* P<0.0001, # P<0.05. IgG1 staining was not significantly different between A/J and *Nfkbid*<sup>+/-</sup>-  
845 serums. E) Representative FACS plots of the dump- CD19+ CD138+ plasmablast populations  
846 within A/J, C57BL/6J and *Nfkbid*<sup>+/-</sup> mice at day 5 of secondary infection with type I GT1 parasites.  
847 F) Frequency of B220- CD138+ plasmablasts of total live dump- CD19+ cells. Plotted is the  
848 cumulative average +/-SD of 2 separate experiments (n=5 per mouse strain); significance was  
849 assessed by unpaired t-tests; \* P< 0.05.

850 **SUPPLEMENTAL INFORMATION**

851

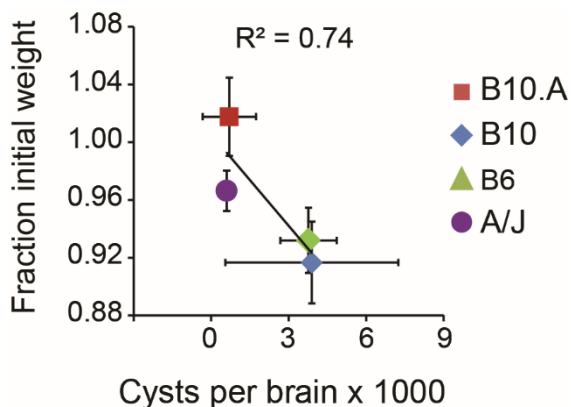

852

853

854 **Figure S1. Cyst burden and weight during chronic infection with the low virulent type III**

855 **CEP strain correlates with the murine H-2 locus.**

856 A/J, C57BL/6J (B6), C57BL/10J (B10), and C57BL/10.AJ (B10.A) mice were injected with the

857 type III strain *CEP hxgprt-* and allowed to progress to chronic infection. Plotted (+/- SEM) is the

858 average cyst number (x 1000) in the brain vs. the average fraction of initial weight, where 1 is the

859 normalized weight on the day of type III injection; the regression value ( $R^2$ ) is indicated. Results

860 are from 3 to 5 mice for cyst numbers (day 42 of chronic infection), and 5-12 mice for weight

861 measurements (day 30 of chronic infection) per mouse strain.

862

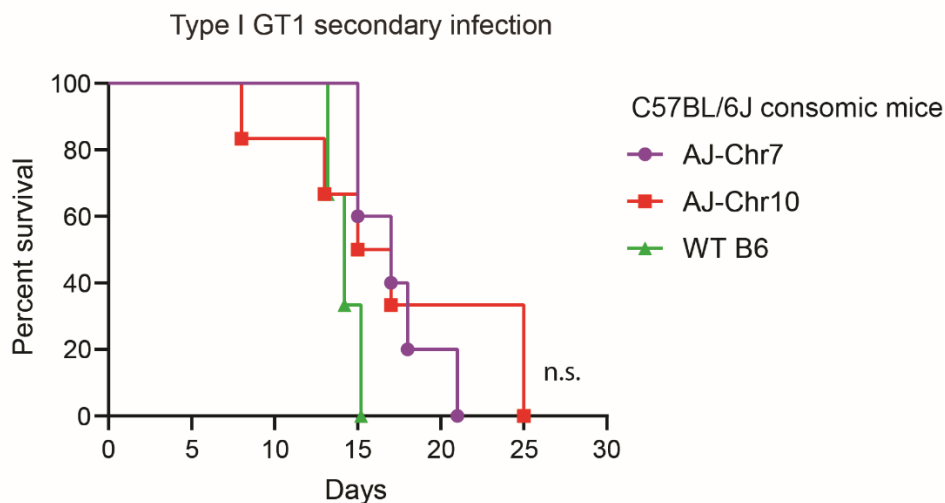

863

864 **Figure S2. Consomic mice succumb to type I GT1 secondary infection.**

865 Consomic mice of the C57BL/6J background with A/J chromosomal substitutions for chromosome  
866 7 (C57BL/6J-Chr7<sup>A/J</sup>/NaJ) or chromosome 10 (C57BL/6J-Chr10<sup>A/J</sup>/NaJ) were infected with the  
867 type III CEP *hxgprrt*- strain and allowed to progress to chronic infection. Mice were then given a  
868 secondary infection with the type I GT1 strain. Cumulative survival is shown for 2 independent  
869 experiments (CSS7 n=5, CSS10 n=6); n.s., Mantel-Cox.

870

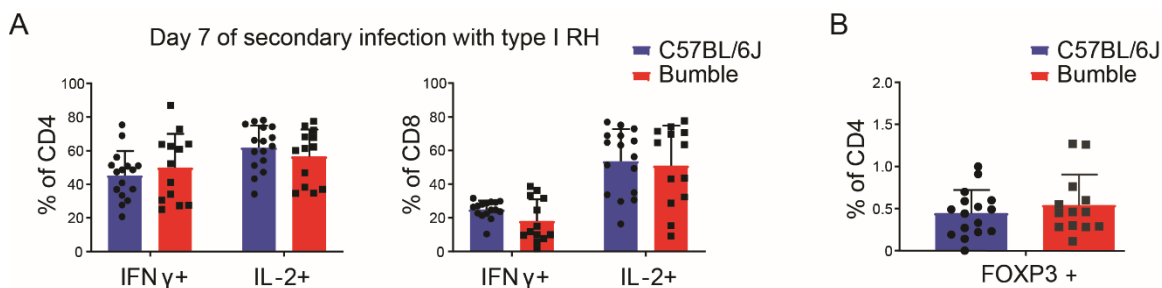

871

872 **Figure S3. Bumble mice have intact T cell responses during secondary infection.**

873 A) Peritoneal CD4 and CD8 T cells from bumble and C57BL/6J mice were assessed at day 7 of  
874 secondary infection with the type I RH strain by an in vitro recall assay and assayed for intracellular  
875 IFN $\gamma$  and IL-2. In brief, peritoneal cells were harvested and infected with live type I RH parasites  
876 for 16 hrs. T cells were assessed for production of granzyme IFN $\gamma$ , and IL-2 by intracellular staining  
877 and FACS. B) Peritoneal T-regulatory cells (CD4+ CD25+ Foxp3+) were quantified at day 7 of  
878 secondary infection with type I RH strain. Each dot represents the result from one mouse, and  
879 plotted are cumulative averages  $\pm$ SD from 3 experiments; no significant differences were observed  
880 between bumble and C57BL/6J mice by unpaired t-tests with the Holm-Sidak correction for  
881 multiple comparisons.

882

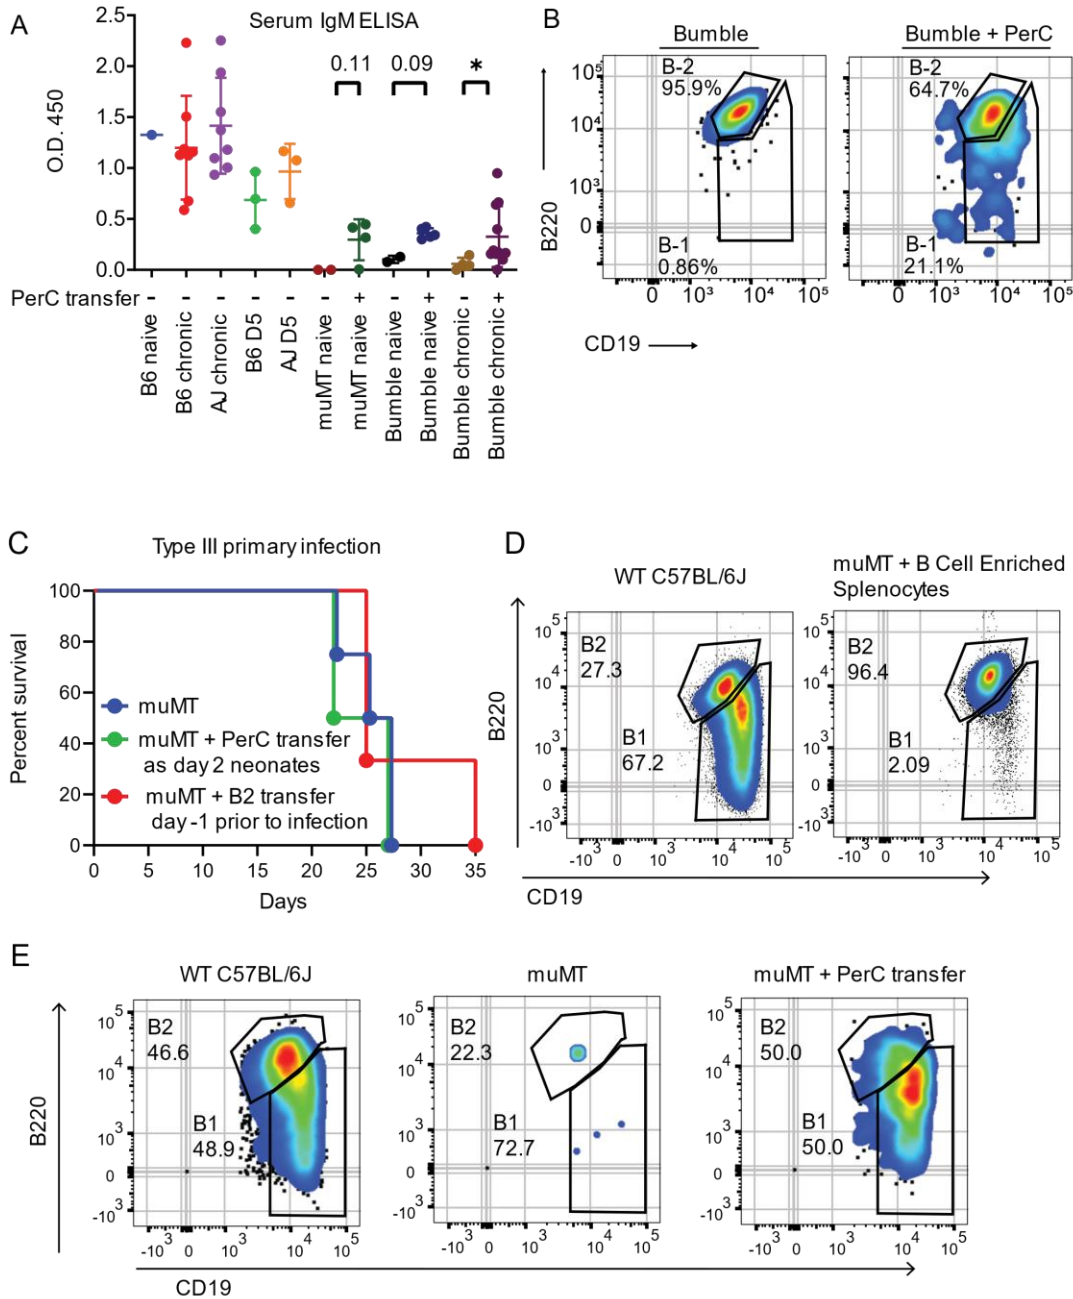

883

884 **Figure S4. Assessing PerC reconstitutions by serum IgM ELISAs and flow cytometry, and**  
 885 **survival of muMT mice.**

886 A) Serum IgM from C57BL/6J, muMT, bumble, and A/J mice was measured by ELISA. Serum  
 887 was harvested from mice either naïve, chronically infected with type III CEP strain, or on D5 post-  
 888 secondary infection with type I GT1 *T. gondii* strain. PerC transfer (+) refers to mice adoptively

889 transferred  $5 \times 10^6$  total PerC cells as a day 2 neonate. Each dot represents the results from an  
890 individual mouse, and plotted is the average  $\pm$ SD of the O.D. obtained at 450nm; \*P<0.05,  
891 unpaired two-tailed t-test. B) Bumble reconstitution of the peritoneal B-1 compartment after  
892 neonatal PerC adoptive transfer. Representative FACS plots of peritoneal B-2 cells (B220<sup>high</sup>  
893 CD19+) and B-1 (B220<sup>int-neg</sup> CD19+) cells from bumble mice with or without PerC adoptive  
894 transfer. Shown are mice on day 20 of primary infection with the type III CEP strain. C) B cell  
895 deficient muMT mice (n=3), muMT given WT PerC adoptive transfers as 2-day neonates then  
896 allowed to reconstitute for 6-7 weeks into adulthood (n=2), and muMT given B cell enriched  
897 splenocytes (n=3) 1 day prior to infection with the type III CEP strain were assessed for survival.  
898 D) muMT reconstitution of B-2 cell compartment, WT and muMT with B cell enriched splenocytes  
899 (EasySep™ Mouse Pan-B Cell Isolation Kit, cat# 19844) adoptively transferred 24 hrs earlier E)  
900 muMT reconstitution of peritoneal B cell compartment after neonatal adoptive transfer.  
901 Representative FACS plots of peritoneal B-2 cells (B220<sup>high</sup> CD19+) and B-1 B cells (B220<sup>int-</sup>  
902 neg CD19+) from WT, and muMT mice or muMT mice with neonatal PerC adoptive transfer. For  
903 D and E, uninfected mice are 6-8 weeks of age and numbers indicate the percent of cells that fall  
904 within the depicted gate.  
905



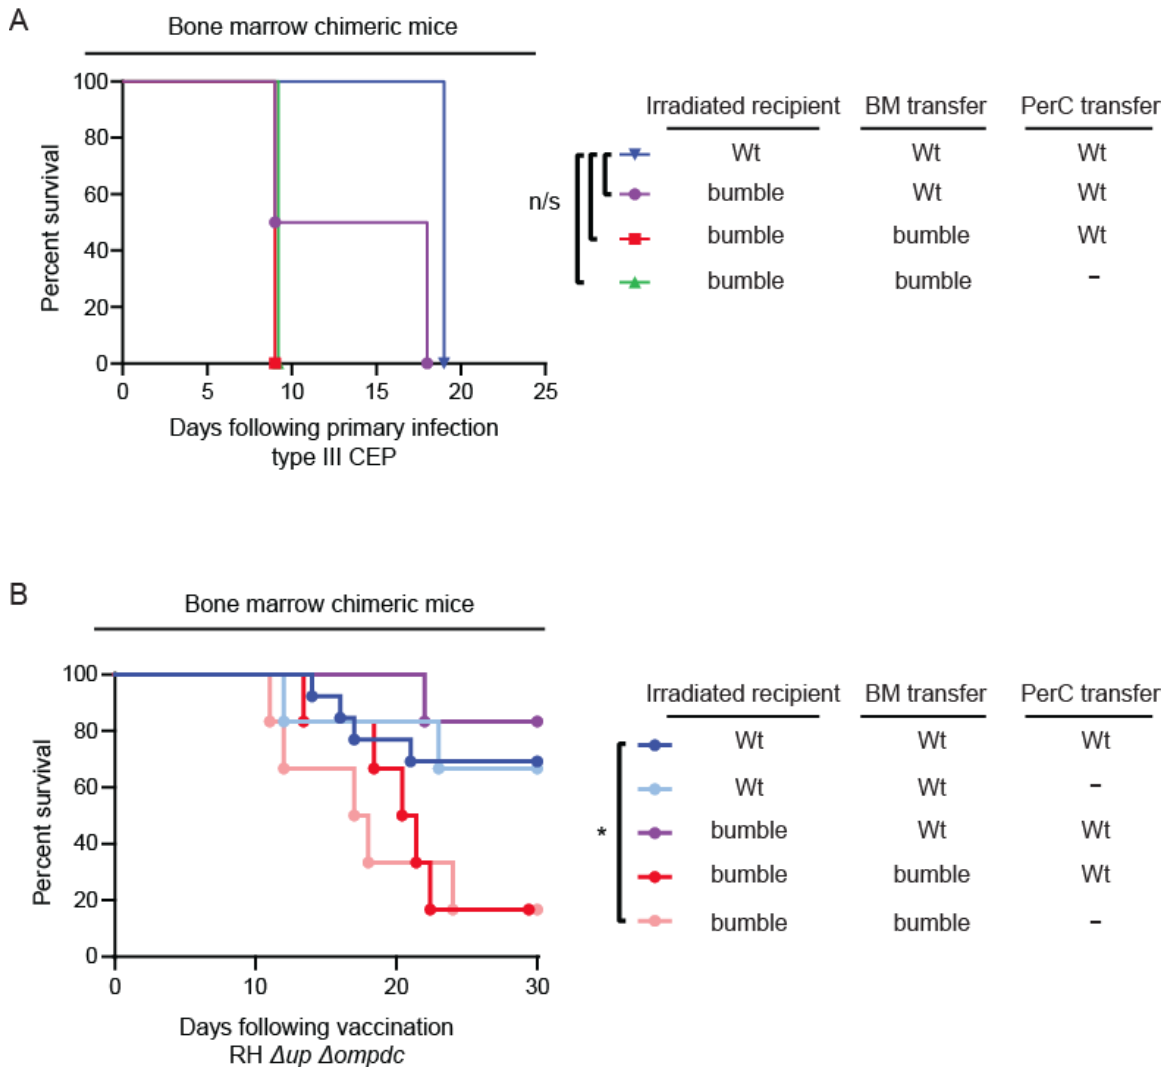

906

907 **Figure S5. Bone marrow chimeric mice fail to survive primary infection but exhibit improved**  
 908 **survival to vaccine strains.**

909 A) Survival of the indicated bone marrow (BM) chimeras infected with the type III CEP *T. gondii*  
 910 strain are plotted from a single experiment (n=2 for bumble recipients per condition; n=1 for  
 911 C57BL/6J recipients); n.s., Mantel-Cox. B) Survival of the indicated BM chimeras vaccinated ( $10^6$   
 912 i.p.) with the uracil auxotroph strain, Rh  $\Delta up \Delta ompdc$ . Results are cumulative from 2-3 separate  
 913 transfers and vaccinations; (n=4-9 per condition).

914

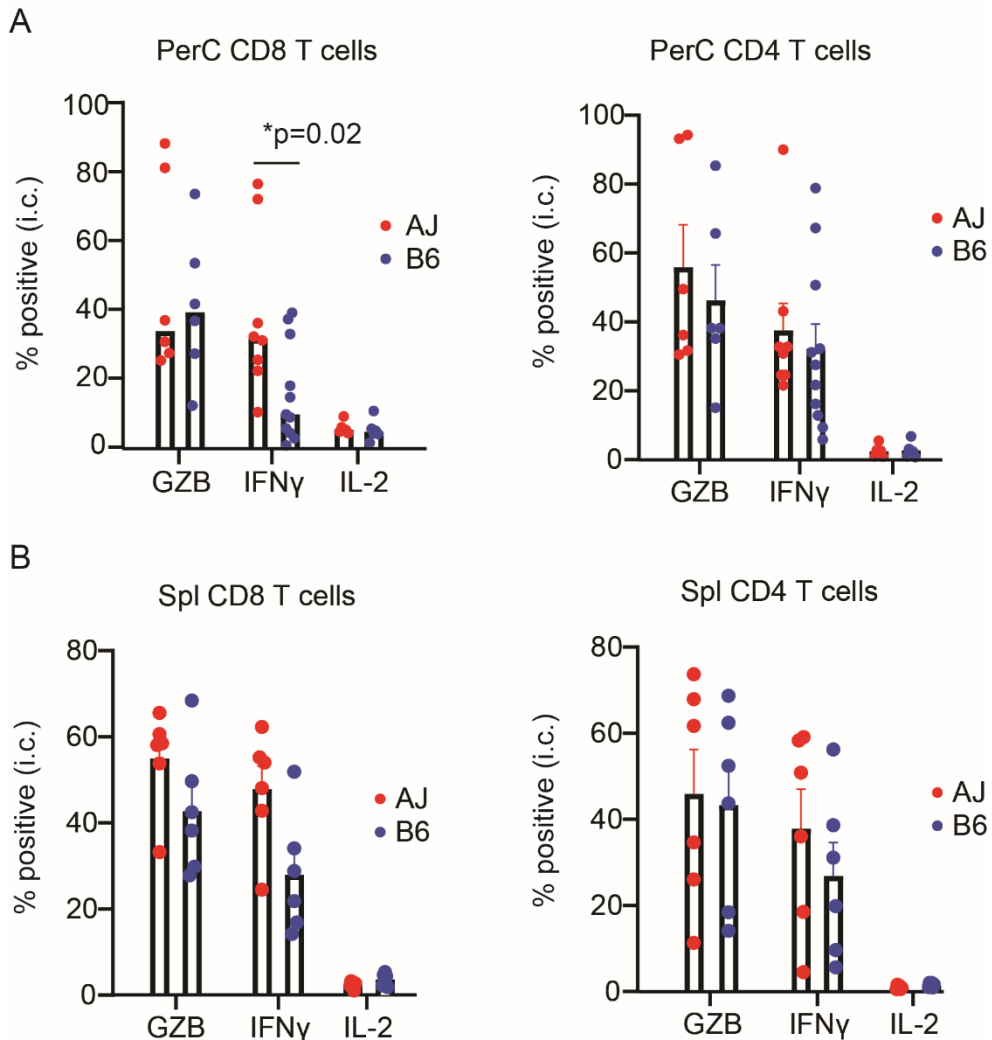

915

916 **Figure S6. CD8 T cell IFN $\gamma$  frequencies are increased in resistant A/J mice.**

917 A) Peritoneal and B) splenic cells were harvested from A/J and C57BL6/J mice chronically infected  
918 with type III CEP *T. gondii* strain, and infected with live type I parasites for 16 hrs. T cells were  
919 assessed for production of granzyme B (GZB), IFN $\gamma$ , and IL-2 by intracellular staining and FACS.  
920 The average frequency +/-SD of positive staining CD4+ or CD8+ T cells (CD3+ CD19-) and  
921 cumulative results from 2-3 experiments (AJ n=8, C57BL6/J n=11) are shown; \* P<0.05, unpaired  
922 two-tailed t-test.

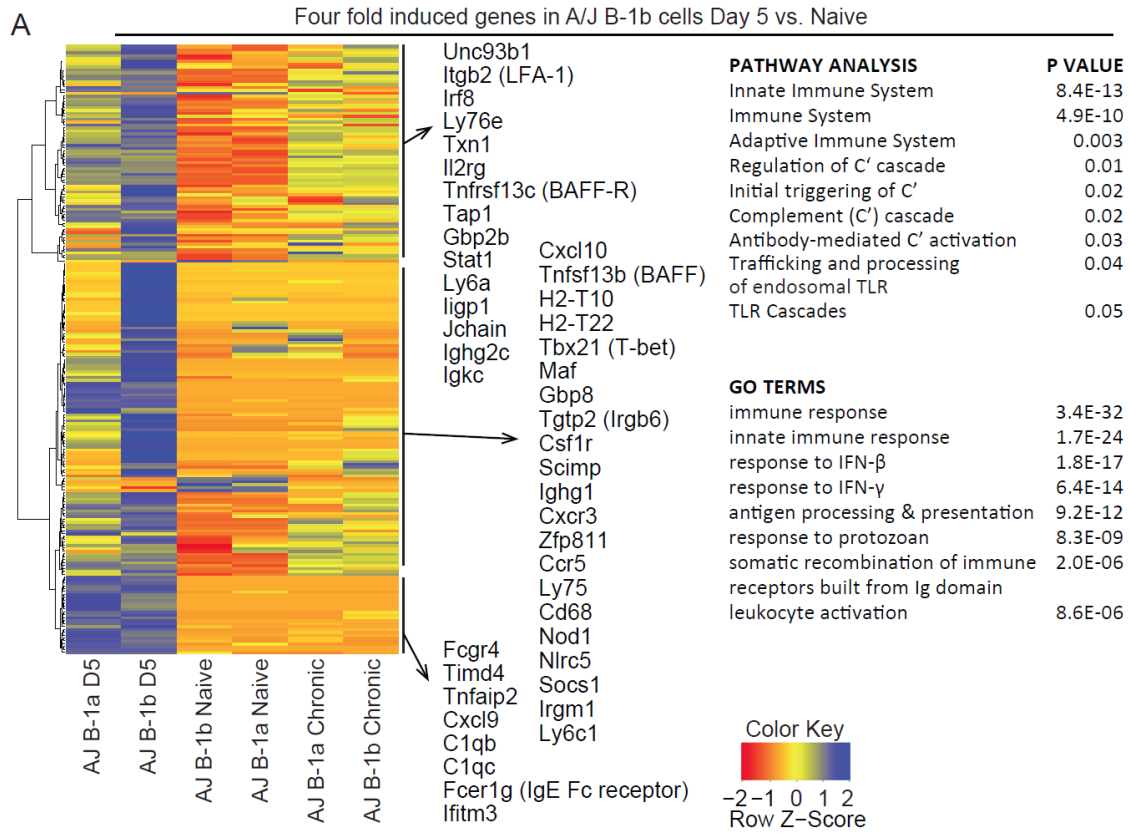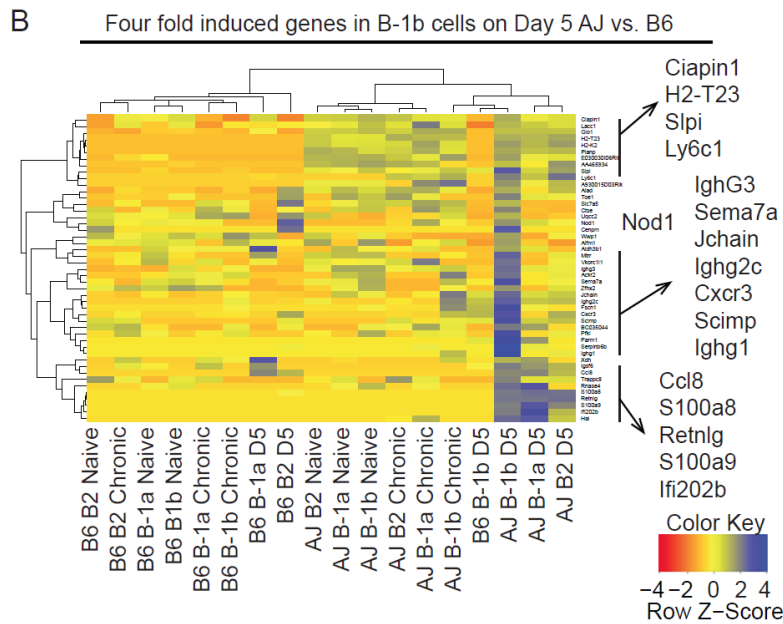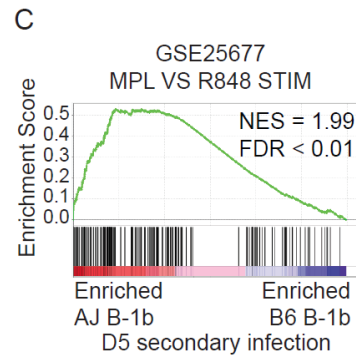

923

924

925

926 **Figure S7. Genes uniquely induced in B-1b cells on day 5 of secondary infection in resistant**  
927 **A/J mice.**

928 Transcriptomic analysis of peritoneal B-1a (CD19<sup>+</sup> B220<sup>int-neg</sup> CD11b<sup>+</sup> CD5<sup>+</sup>), B-1b (CD19<sup>+</sup>  
929 B220<sup>int-neg</sup> CD11b<sup>+</sup> CD5<sup>-</sup>) and B-2 (CD19<sup>+</sup> B220<sup>hi</sup> CD11b<sup>-</sup> CD5<sup>-</sup>) B cells from A/J and C57BL/6J  
930 mice was performed using 3'-Tag RNA sequencing. A) Genes that were differentially upregulated  
931 in B-1b cells on day 5 of secondary infection compared to naïve mice in the A/J genetic background.  
932 P values of differentially expressed genes were calculated using the Benjamini-Hochberg  
933 adjustment for false discovery rate, and only those genes that survived significance were included  
934 in the heatmap. For comparison, all B-1 compartments in A/J mice are shown for this gene set. A/J  
935 B-1 Pathway and GO term enrichment was assessed on the genes presented in the heatmap in A. P  
936 values for enrichment analysis were adjusted with the Holm-Bonferroni correction. B) A cluster of  
937 genes found to be differentially induced in B-1b cells in A/J compared to C57BL/6J mice on day 5  
938 of secondary infection are plotted as a heat map. C) Gene set enrichment analysis of the rank-  
939 ordered list of differentially expressed genes between A/J and C57BL/6J B-1b cells at D5 of  
940 secondary infection. Gene set depicted was in the top 10 gene sets ranked by false discovery rate  
941 (FDR) after investigating MSigDB's C7: immunologic signatures collection. Enrichment score is  
942 the degree of overrepresentation of a gene set at the top or bottom of a ranked list. NES is the  
943 enrichment score after normalizing for gene set size.

| Mouse Strain                  | Chronic Infection                | Secondary Infection | <sup>1</sup> Heterologous Brain Coinfection? |
|-------------------------------|----------------------------------|---------------------|----------------------------------------------|
| C57BL/10                      | CEP <i>hxgp</i> r <sup>t</sup> - | GUYMAT              | 1/1                                          |
| Cumulative average C57BL/10   |                                  |                     | 1/1 = 100%                                   |
| C57BL/10.A                    | CEP <i>hxgp</i> r <sup>t</sup> - | TgCATBr5            | 2/2                                          |
| C57BL/10.A                    | CEP <i>hxgp</i> r <sup>t</sup> - | GUYMAT              | 2/2                                          |
| C57BL/10.A                    | CEP <i>hxgp</i> r <sup>t</sup> - | MAS                 | 1/2                                          |
| C57BL/10.A                    | CEP <i>hxgp</i> r <sup>t</sup> - | FOU                 | 0/1                                          |
| Cumulative average C57BL/10.A |                                  |                     | 5/7 = 71%                                    |
| A/J                           | CEP <i>hxgp</i> r <sup>t</sup> - | GUYMAT              | 0/4                                          |
| A/J                           | CEP <i>hxgp</i> r <sup>t</sup> - | TgCATBr5            | 0/5                                          |
| A/J                           | CEP <i>hxgp</i> r <sup>t</sup> - | GUYDOS              | 4/5                                          |
| A/J                           | CEP <i>hxgp</i> r <sup>t</sup> - | VAND                | 4/6                                          |
| A/J                           | CEP <i>hxgp</i> r <sup>t</sup> - | FOU                 | 1/5                                          |
| A/J                           | CEP <i>hxgp</i> r <sup>t</sup> - | GPHT                | 0/5                                          |
| A/J                           | CEP <i>hxgp</i> r <sup>t</sup> - | MAS                 | 0/5                                          |
| Cumulative average A/J        |                                  |                     | 9/35 = 26%                                   |

944

945 **Table S1. Virulent strains of *Toxoplasma gondii* superinfect genetically resistant hosts.**

946 CEP *hxgp*r<sup>t</sup>- chronically infected C57BL/10, C57BL/10.A, and A/J mice were given a secondary  
947 infection with the indicated atypical *T. gondii* strain; then, 35-45 days after secondary infection,  
948 brains from surviving mice were homogenized in PBS and used to inoculate HFF monolayers. The  
949 resultant parasite cultures were then tested for the presence of the secondary infection strain;  
950 numerator = number of mice tested positive for secondary infection strain in the brain; denominator  
951 = number of mice that exhibited parasite growth in the HFF monolayer prior to drug selection.

952 <sup>1</sup>Parasite growth was observed in mycophenolic acid / xanthine medium, which selects for parasites  
953 encoding a functional *HXGPRT* gene (i.e. the challenging atypical strains) and kills the primary  
954 infection CEP *hxgp*r<sup>t</sup>- strain.

| <b>Recombinant Inbred Strain</b> | <b>Type III CEP Primary Infection Survival</b> | <b>Type I GT1 Secondary Infection Survival</b> | <b><sup>1</sup>Heterologous Brain Coinfection?</b> |
|----------------------------------|------------------------------------------------|------------------------------------------------|----------------------------------------------------|
| AXB1                             | 100                                            | 0                                              | N/A                                                |
| AXB2                             | 100                                            | 100                                            | 0/2                                                |
| AXB4                             | 0                                              | N/A                                            | N/A                                                |
| AXB5                             | 50                                             | 100                                            | 1/1                                                |
| AXB6                             | 0                                              | N/A                                            | N/A                                                |
| AXB8                             | 100                                            | 50                                             | 1/1                                                |
| AXB10                            | 0                                              | N/A                                            | N/A                                                |
| AXB12                            | 100                                            | 100                                            | 2/2                                                |
| AXB13                            | 0                                              | N/A                                            | N/A                                                |
| AXB15                            | 100                                            | 100                                            | 1/2                                                |
| AXB19                            | 100                                            | 0                                              | N/A                                                |
| AXB23                            | 100                                            | 0                                              | N/A                                                |
| AXB24                            | 100                                            | 0                                              | N/A                                                |
| BXA1                             | 50                                             | 0                                              | N/A                                                |
| BXA2                             | 100                                            | 0                                              | N/A                                                |
| BXA4                             | 100                                            | 100                                            | 0/1                                                |
| BXA7                             | 100                                            | 0                                              | N/A                                                |
| BXA8                             | 100                                            | 100                                            | 2/2                                                |
| BXA11                            | 100                                            | 0                                              | N/A                                                |
| BXA12                            | 100                                            | 100                                            | 1/1                                                |
| BXA13                            | 100                                            | 100                                            | 0/1                                                |
| BXA14                            | 100                                            | 0                                              | N/A                                                |
| BXA16                            | 100                                            | 0                                              | N/A                                                |
| BXA24                            | 100                                            | 50                                             | N/A                                                |
| BXA25                            | 100                                            | 100                                            | 1/2                                                |
| BXA26                            | 100                                            | 100                                            | 0/2                                                |
| <b>Cumulative Average</b>        | 82.6%                                          | 50%                                            | 9/17 = 52.9%                                       |

955 **Table S2. Primary and secondary infection survival of recombinant inbred mice (AxB;BxA).**

956 26 strains (n = 2) from the RI (AxB; BxA) panel were infected with 10<sup>4</sup> type III avirulent CEP  
957 *hxgprt*- *T. gondii* parasites; then, 35 days later, mice were challenged with 5x10<sup>4</sup> virulent type I  
958 GT1 *T. gondii* parasites. Primary and secondary infection survival percentages are indicated. 35-  
959 45 days after secondary challenge, brains from the surviving RI mice were homogenized in PBS  
960 and used to inoculate HFF monolayers. The resultant parasite cultures were then tested for the  
961 presence of the challenging strain; numerator = number of mice tested positive for secondary  
962 infection strain in the brain; denominator = number of mice that exhibited parasite growth in the  
963 HFF monolayer prior to drug selection. Some surviving mice failed to generate parasite positive  
964 cultures.

965 <sup>1</sup>Parasite growth was observed in mycophenolic acid / xanthine medium, which selects for GT1  
966 parasites (the challenging strain) encoding the endogenous *HXGPRT* gene and against the primary  
967 infection CEP *hxgprt*- strain.

968

969

970 **Dataset S1. Polymorphic genes between A/J and C57BL/6J encoded within the four QTLs**  
971 **that define immunity to *Toxoplasma gondii*.**

972 For each of the four QTLs that define secondary infection immunity to *T. gondii*, a list of all genes  
973 that have a DNA polymorphism between A/J and C57BL/6J mice, and are encoded within the QTL  
974 boundaries defined by the maximal genetic marker (real or imputed markers inferred in r/QTL) and  
975 the two flanking markers on either side; LOD scores and position are indicated. For each gene, its  
976 location and unique identifiers are listed, as well as the number and class of small nucleotide  
977 polymorphism (SNP) between A/J and C57BL/6J are shown. Total number of SNPs for each gene  
978 were also tallied ('Sum mutation'), and in bold are genes whose SNPs are two standard deviations  
979 greater than the average SNP for that class within the QTL region. In these QTL regions, there were  
980 also 476 (chr7), 88 (chr10), 40 (chr11) and 375 SNPs (chr17) that did not associate with any gene  
981 in the QTL boundaries. UTR, untranslated region; 'Region SNP', SNPs that are +/- 2 kb of the gene  
982 boundaries. Data obtained from Mouse Genome Informatics (MGI) ([informatics.jax.org](http://informatics.jax.org)), and each  
983 locus is in a separate tab.

984

985 **Dataset S2. Transcriptomic analysis of B cells responding to *Toxoplasma gondii* infection.**

986 Table of genes included (threshold of  $\geq 5$  CPM in any sample) in differential gene expression  
987 analysis. For each gene the Ensembl ID, MGI ID, gene symbol and descriptions are listed. The  
988 CPM from 3 samples of peritoneal B-1a, B-1b, and B-2 at naïve (N), chronic (Ch), and day 5 (D5)  
989 of secondary infection in both A/J (AJ) and C57BL/6J (B6) mice are given. The average CPM was  
990 calculated for each set of samples and average counts less than 5 CPM were raised to 5 to reduce  
991 the effect of low expression genes in further analysis. The log<sub>2</sub> fold change (FC) of gene expression  
992 was calculated using the average CPM for each cell type (B-1a, B-1b, and B-2) of each strain (A/J  
993 and C57BL/6J) as they progressed from naïve to chronic infection or chronic to D5 secondary  
994 infection. The Log<sub>2</sub> FC was also calculated from naïve to D5 of secondary infection. The Log<sub>2</sub> FC



995 between A/J and C57BL/6J was calculated for each cell type. Genes were then ranked by the  
996 number of comparisons that exhibited greater than 4FC by the indicated comparison.

997

## 998 REFERENCES

999

- 1000 1. Sacks DL. Vaccines against tropical parasitic diseases: a persisting answer to a persisting  
1001 problem. *Nat Immunol.* 2014;15: 403-405. doi: 10.1038/ni.2853 [doi].
- 1002 2. Lorenzi H, Khan A, Behnke MS, Namasivayam S, Swapna LS, Hadjithomas M, et al. Local  
1003 admixture of amplified and diversified secreted pathogenesis determinants shapes mosaic  
1004 *Toxoplasma gondii* genomes. *Nat Commun.* 2016;7: 10147. doi: 10.1038/ncomms10147 [doi].
- 1005 3. Howe DK, Sibley LD. *Toxoplasma gondii* comprises three clonal lineages: correlation of  
1006 parasite genotype with human disease. *J Infect Dis.* 1995;172: 1561-1566.
- 1007 4. Grigg ME, Ganatra J, Boothroyd JC, Margolis TP. Unusual Abundance of Atypical Strains  
1008 Associated with Human Ocular Toxoplasmosis. *J Infect Dis.* 2001;184: 633-639. doi:  
1009 10.1086/322800.
- 1010 5. Khan A, Jordan C, Muccioli C, Vallochi AL, Rizzo LV, Belfort R, Jr, et al. Genetic divergence  
1011 of *Toxoplasma gondii* strains associated with ocular toxoplasmosis, Brazil. *Emerg Infect Dis.*  
1012 2006;12: 942-949.
- 1013 6. McLeod R, Boyer KM, Lee D, Mui E, Wroblewski K, Karrison T, et al. Prematurity and  
1014 severity are associated with *Toxoplasma gondii* alleles (NCCCTS, 1981-2009). *Clin Infect Dis.*  
1015 2012;54: 1595-1605. doi: 10.1093/cid/cis258 [doi].
- 1016 7. Suzuki Y, Remington JS. The effect of anti-IFN-gamma antibody on the protective effect of  
1017 *Lyt-2+* immune T cells against toxoplasmosis in mice. *J Immunol.* 1990;144: 1954-1956.
- 1018 8. Gazzinelli RT, Hakim FT, Hieny S, Shearer GM, Sher A. Synergistic role of CD4+ and CD8+  
1019 T lymphocytes in IFN-gamma production and protective immunity induced by an attenuated  
1020 *Toxoplasma gondii* vaccine. *J Immunol.* 1991;146: 286-292.
- 1021 9. Gigley JP, Fox BA, Bzik DJ. Cell-mediated immunity to *Toxoplasma gondii* develops  
1022 primarily by local Th1 host immune responses in the absence of parasite replication. *J Immunol.*  
1023 2009;182: 1069-1078. doi: 10.1093/infdis/jin325 [pii].
- 1024 10. Casciotti L, Ely KH, Williams ME, Khan IA. CD8(+)-T-cell immunity against *Toxoplasma*  
1025 *gondii* can be induced but not maintained in mice lacking conventional CD4(+) T cells. *Infect*  
1026 *Immun.* 2002;70: 434-443. doi: 10.1128/iai.70.2.434-443.2002 [doi].
- 1027 11. Johnson LL, Sayles PC. Deficient humoral responses underlie susceptibility to *Toxoplasma*  
1028 *gondii* in CD4-deficient mice. *Infect Immun.* 2002;70: 185-191.

- 1029 12. Chen M, Mun HS, Piao LX, Aosai F, Norose K, Mohamed RM, et al. Induction of protective  
1030 immunity by primed B-1 cells in *Toxoplasma gondii* -infected B cell-deficient mice. *Microbiol*  
1031 *Immunol.* 2003;47: 997-1003.
- 1032 13. Kang H, Remington JS, Suzuki Y. Decreased resistance of B cell-deficient mice to infection  
1033 with *Toxoplasma gondii* despite unimpaired expression of IFN-gamma, TNF-alpha, and inducible  
1034 nitric oxide synthase. *J Immunol.* 2000;164: 2629-2634. doi: [ji\\_v164n5p2629](https://doi.org/10.1093/infdis/ji_v164n5p2629) [pii].
- 1035 14. Sayles PC, Gibson GW, Johnson LL. B cells are essential for vaccination-induced resistance  
1036 to virulent *Toxoplasma gondii*. *Infect Immun.* 2000;68: 1026-1033.
- 1037 15. Couper KN, Roberts CW, Brombacher F, Alexander J, Johnson LL. *Toxoplasma gondii*-  
1038 specific immunoglobulin M limits parasite dissemination by preventing host cell invasion. *Infect*  
1039 *Immun.* 2005;73: 8060-8068. doi: [73/12/8060](https://doi.org/10.1128/IAI.00333-12) [pii].
- 1040 16. Mineo JR, McLeod R, Mack D, Smith J, Khan IA, Ely KH, et al. Antibodies to *Toxoplasma*  
1041 *gondii* major surface protein (SAG-1, P30) inhibit infection of host cells and are produced in  
1042 murine intestine after peroral infection. *J Immunol.* 1993;150: 3951-3964.
- 1043 17. Joiner KA, Fuhrman SA, Miettinen HM, Kasper LH, Mellman I. *Toxoplasma gondii*: fusion  
1044 competence of parasitophorous vacuoles in Fc receptor-transfected fibroblasts. *Science.*  
1045 1990;249: 641-646.
- 1046 18. Glatman Zaretsky A, Silver JS, Siwicki M, Durham A, Ware CF, Hunter CA. Infection with  
1047 *Toxoplasma gondii* alters lymphotoxin expression associated with changes in splenic architecture.  
1048 *Infect Immun.* 2012;80: 3602-3610. doi: [10.1128/IAI.00333-12](https://doi.org/10.1128/IAI.00333-12) [doi].
- 1049 19. Stumhofer JS, Silver JS, Hunter CA. IL-21 is required for optimal antibody production and T  
1050 cell responses during chronic *Toxoplasma gondii* infection. *PLoS One.* 2013;8: e62889. doi:  
1051 [10.1371/journal.pone.0062889](https://doi.org/10.1371/journal.pone.0062889) [doi].
- 1052 20. Smith FL, Baumgarth N. B-1 cell responses to infections. *Curr Opin Immunol.* 2019;57: 23-  
1053 31. doi: [S0952-7915\(18\)30151-1](https://doi.org/10.1016/j.immuni.2004.06.019) [pii].
- 1054 21. Alugupalli KR, Leong JM, Woodland RT, Muramatsu M, Honjo T, Gerstein RM. B1b  
1055 lymphocytes confer T cell-independent long-lasting immunity. *Immunity.* 2004;21: 379-390. doi:  
1056 [10.1016/j.immuni.2004.06.019](https://doi.org/10.1016/j.immuni.2004.06.019) [doi].
- 1057 22. Yang Y, Ghosn EE, Cole LE, Obukhanych TV, Sadate-Ngatchou P, Vogel SN, et al. Antigen-  
1058 specific antibody responses in B-1a and their relationship to natural immunity. *Proc Natl Acad*  
1059 *Sci U S A.* 2012;109: 5382-5387. doi: [10.1073/pnas.1121631109](https://doi.org/10.1073/pnas.1121631109) [doi].
- 1060 23. Pape KA, Taylor JJ, Maul RW, Gearhart PJ, Jenkins MK. Different B cell populations  
1061 mediate early and late memory during an endogenous immune response. *Science.* 2011;331:  
1062 1203-1207. doi: [10.1126/science.1201730](https://doi.org/10.1126/science.1201730) [doi].
- 1063 24. Krishnamurty AT, Thouvenel CD, Portugal S, Keitany GJ, Kim KS, Holder A, et al.  
1064 Somatic Hypermutated Plasmodium-Specific IgM(+) Memory B Cells Are Rapid, Plastic,  
1065 Early Responders upon Malaria Rechallenge. *Immunity.* 2016;45: 402-414. doi:  
1066 [10.1016/j.immuni.2016.06.014](https://doi.org/10.1016/j.immuni.2016.06.014) [doi].

- 1067 25. Jensen KD, Camejo A, Melo MB, Cordeiro C, Julien L, Grotenbreg GM, et al. Toxoplasma  
1068 gondii superinfection and virulence during secondary infection correlate with the exact  
1069 ROP5/ROP18 allelic combination. *MBio*. 2015;6: 2280. doi: 10.1128/mBio.02280-14 [doi].
- 1070 26. Splitt SD, Souza SP, Valentine KM, Castellanos BE, Curd AB, Hoyer KK, et al. PD-L1,  
1071 TIM-3, and CTLA-4 blockade fail to promote resistance to secondary infection with virulent  
1072 strains of Toxoplasma gondii. *Infect Immun*. 2018. doi: IAI.00459-18 [pii].
- 1073 27. McLeod R, Skamene E, Brown CR, Eisenhauer PB, Mack DG. Genetic regulation of early  
1074 survival and cyst number after peroral Toxoplasma gondii infection of A x B/B x A recombinant  
1075 inbred and B10 congenic mice. *J Immunol*. 1989;143: 3031-3034.
- 1076 28. Brown CR, Hunter CA, Estes RG, Beckmann E, Forman J, David C, et al. Definitive  
1077 identification of a gene that confers resistance against Toxoplasma cyst burden and encephalitis.  
1078 *Immunology*. 1995;85: 419-428.
- 1079 29. Hassan MA, Jensen KD, Butty V, Hu K, Boedec E, Prins P, et al. Transcriptional and Linkage  
1080 Analyses Identify Loci that Mediate the Differential Macrophage Response to Inflammatory  
1081 Stimuli and Infection. *PLoS Genet*. 2015;11: e1005619. doi: 10.1371/journal.pgen.1005619 [doi].
- 1082 30. Schuster M, Annemann M, Plaza-Sirvent C, Schmitz I. Atypical IkappaB proteins - nuclear  
1083 modulators of NF-kappaB signaling. *Cell Commun Signal*. 2013;11: 23-23. doi: 10.1186/1478-  
1084 811X-11-23 [doi].
- 1085 31. Touma M, Keskin DB, Shiroki F, Saito I, Koyasu S, Reinherz EL, et al. Impaired B cell  
1086 development and function in the absence of IkappaBNS. *J Immunol*. 2011;187: 3942-3952. doi:  
1087 10.4049/jimmunol.1002109 [doi].
- 1088 32. Arnold CN, Pirie E, Dosenovic P, McInerney GM, Xia Y, Wang N, et al. A forward genetic  
1089 screen reveals roles for Nfkbid, Zeb1, and Ruvbl2 in humoral immunity. *Proc Natl Acad Sci U S*  
1090 *A*. 2012;109: 12286-12293. doi: 10.1073/pnas.1209134109 [doi].
- 1091 33. Pedersen GK, Adori M, Stark JM, Khoenkhoe S, Arnold C, Beutler B, et al. Heterozygous  
1092 Mutation in IkappaBNS Leads to Reduced Levels of Natural IgM Antibodies and Impaired  
1093 Responses to T-Independent Type 2 Antigens. *Front Immunol*. 2016;7: 65. doi:  
1094 10.3389/fimmu.2016.00065 [doi].
- 1095 34. Khoenkhoe S, Erikson E, Adori M, Stark JM, Scholz JL, Cancro MP, et al. TACI expression  
1096 and plasma cell differentiation are impaired in the absence of functional IkappaBNS. *Immunol*  
1097 *Cell Biol*. 2019;97: 485-497. doi: 10.1111/imcb.12228 [doi].
- 1098 35. Touma M, Antonini V, Kumar M, Osborn SL, Bobenchik AM, Keskin DB, et al. Functional  
1099 role for I kappa BNS in T cell cytokine regulation as revealed by targeted gene disruption. *J*  
1100 *Immunol*. 2007;179: 1681-1692. doi: 179/3/1681 [pii].
- 1101 36. Schuster M, Glauben R, Plaza-Sirvent C, Schreiber L, Annemann M, Floess S, et al.  
1102 IkappaB(NS) protein mediates regulatory T cell development via induction of the Foxp3  
1103 transcription factor. *Immunity*. 2012;37: 998-1008. doi: 10.1016/j.immuni.2012.08.023 [doi].

- 1104 37. Kuwata H, Matsumoto M, Atarashi K, Morishita H, Hirotsu T, Koga R, et al. IkappaBNS  
1105 inhibits induction of a subset of Toll-like receptor-dependent genes and limits inflammation.  
1106 *Immunity*. 2006;24: 41-51. doi: S1074-7613(05)00377-8 [pii].
- 1107 38. Berthier-Vergnes O, El Kharbili M, de la Fouchardiere A, Pointecouteau T, Verrando P,  
1108 Wierinckx A, et al. Gene expression profiles of human melanoma cells with different invasive  
1109 potential reveal TSPAN8 as a novel mediator of invasion. *Br J Cancer*. 2011;104: 155-165. doi:  
1110 10.1038/sj.bjc.6605994 [doi].
- 1111 39. Zhao K, Wang Z, Hackert T, Pitzer C, Zoller M. Tspan8 and Tspan8/CD151 knockout mice  
1112 unravel the contribution of tumor and host exosomes to tumor progression. *J Exp Clin Cancer*  
1113 *Res*. 2018;37: 312-6. doi: 10.1186/s13046-018-0961-6 [doi].
- 1114 40. Kim CC, Baccarella AM, Bayat A, Pepper M, Fontana MF. FCRL5(+) Memory B Cells  
1115 Exhibit Robust Recall Responses. *Cell Rep*. 2019;27: 1446-1460.e4. doi: S2211-1247(19)30484-  
1116 X [pii].
- 1117 41. Pedersen GK, Adori M, Khoenkhoen S, Dosenovic P, Beutler B, Karlsson Hedestam GB. B-  
1118 1a transitional cells are phenotypically distinct and are lacking in mice deficient in IkappaBNS.  
1119 *Proc Natl Acad Sci U S A*. 2014;111: 4119. doi: 10.1073/pnas.1415866111 [doi].
- 1120 42. Baumgarth N, Jager GC, Herman OC, Herzenberg LA. CD4+ T cells derived from B cell-  
1121 deficient mice inhibit the establishment of peripheral B cell pools. *Proc Natl Acad Sci U S A*.  
1122 2000;97: 4766-4771. doi: 97/9/4766 [pii].
- 1123 43. Choi YS, Baumgarth N. Dual role for B-1a cells in immunity to influenza virus infection. *J*  
1124 *Exp Med*. 2008;205: 3053-3064. doi: 10.1084/jem.20080979 [doi].
- 1125 44. Kreuk LS, Koch MA, Slayden LC, Lind NA, Chu S, Savage HP, et al. B cell receptor and  
1126 Toll-like receptor signaling coordinate to control distinct B-1 responses to both self and the  
1127 microbiota. *Elife*. 2019;8: 10.7554/eLife.47015. doi: 10.7554/eLife.47015 [doi].
- 1128 45. Lalor PA, Herzenberg LA, Adams S, Stall AM. Feedback regulation of murine Ly-1 B cell  
1129 development. *Eur J Immunol*. 1989;19: 507-513. doi: 10.1002/eji.1830190315 [doi].
- 1130 46. Kantor AB, Stall AM, Adams S, Herzenberg LA, Herzenberg LA. Differential development  
1131 of progenitor activity for three B-cell lineages. *Proc Natl Acad Sci U S A*. 1992;89: 3320-3324.  
1132 doi: 10.1073/pnas.89.8.3320 [doi].
- 1133 47. Yap GS, Sher A. Effector cells of both nonhemopoietic and hemopoietic origin are required  
1134 for interferon (IFN)-gamma- and tumor necrosis factor (TNF)-alpha-dependent host resistance to  
1135 the intracellular pathogen, *Toxoplasma gondii*. *J Exp Med*. 1999;189: 1083-1092. doi:  
1136 10.1084/jem.189.7.1083 [doi].
- 1137 48. Ha SA, Tsuji M, Suzuki K, Meek B, Yasuda N, Kaisho T, et al. Regulation of B1 cell  
1138 migration by signals through Toll-like receptors. *J Exp Med*. 2006;203: 2541-2550. doi:  
1139 jem.20061041 [pii].

- 1140 49. Waffarn EE, Hastej CJ, Dixit N, Soo Choi Y, Cherry S, Kalinke U, et al. Infection-induced  
1141 type I interferons activate CD11b on B-1 cells for subsequent lymph node accumulation. *Nat*  
1142 *Commun.* 2015;6: 8991. doi: 10.1038/ncomms9991 [doi].
- 1143 50. Luo L, Bokil NJ, Wall AA, Kapetanovic R, Lansdaal NM, Marceline F, et al. SCIMP is a  
1144 transmembrane non-TIR TLR adaptor that promotes proinflammatory cytokine production from  
1145 macrophages. *Nat Commun.* 2017;8: 14133. doi: 10.1038/ncomms14133 [doi].
- 1146 51. Suzuki K, Okuno T, Yamamoto M, Pasterkamp RJ, Takegahara N, Takamatsu H, et al.  
1147 Semaphorin 7A initiates T-cell-mediated inflammatory responses through alpha1beta1 integrin.  
1148 *Nature.* 2007;446: 680-684. doi: nature05652 [pii].
- 1149 52. Nguyen TT, Klasener K, Zurn C, Castillo PA, Brust-Mascher I, Imai DM, et al. The IgM  
1150 receptor FcμR limits tonic BCR signaling by regulating expression of the IgM BCR. *Nat*  
1151 *Immunol.* 2017;18: 321-333. doi: 10.1038/ni.3677 [doi].
- 1152 53. Blandino R, Baumgarth N. Secreted IgM: New tricks for an old molecule. *J Leukoc Biol.*  
1153 2019;106: 1021-1034. doi: 10.1002/JLB.3RI0519-161R [doi].
- 1154 54. Savage HP, Klasener K, Smith FL, Luo Z, Reth M, Baumgarth N. TLR induces  
1155 reorganization of the IgM-BCR complex regulating murine B-1 cell responses to infections. *Elife.*  
1156 2019;8: 10.7554/eLife.46997. doi: 10.7554/eLife.46997 [doi].
- 1157 55. Castigli E, Wilson SA, Scott S, Dedeoglu F, Xu S, Lam KP, et al. TACI and BAFF-R mediate  
1158 isotype switching in B cells. *J Exp Med.* 2005;201: 35-39. doi: jem.20032000 [pii].
- 1159 56. Rowland SL, Leahy KF, Halverson R, Torres RM, Pelanda R. BAFF receptor signaling aids  
1160 the differentiation of immature B cells into transitional B cells following tonic BCR signaling. *J*  
1161 *Immunol.* 2010;185: 4570-4581. doi: 10.4049/jimmunol.1001708 [doi].
- 1162 57. Nussenzweig RS, Vanderberg J, Most H, Orton C. Protective immunity produced by the  
1163 injection of x-irradiated sporozoites of plasmodium berghei. *Nature.* 1967;216: 160-162. doi:  
1164 10.1038/216160a0 [doi].
- 1165 58. Hoffman SL, Goh LM, Luke TC, Schneider I, Le TP, Doolan DL, et al. Protection of humans  
1166 against malaria by immunization with radiation-attenuated Plasmodium falciparum sporozoites. *J*  
1167 *Infect Dis.* 2002;185: 1155-1164. doi: JID010922 [pii].
- 1168 59. RTS, S Clinical Trials Partnership. Efficacy and safety of RTS,S/AS01 malaria vaccine with  
1169 or without a booster dose in infants and children in Africa: final results of a phase 3, individually  
1170 randomised, controlled trial. *Lancet.* 2015;386: 31-45. doi: 10.1016/S0140-6736(15)60721-8  
1171 [doi].
- 1172 60. Fox BA, Bzik DJ. Avirulent uracil auxotrophs based on disruption of orotidine-5'-  
1173 monophosphate decarboxylase elicit protective immunity to Toxoplasma gondii. *Infect Immun.*  
1174 2010;78: 3744-3752. doi: 10.1128/IAI.00287-10 [doi].
- 1175
